# Supplementary material for: Aggregation-induced phosphorescence sensitization in two heptanuclear and decanuclear gold–silver sandwich clusters
Source: Royal Society of Chemistry journal article supplement (doi:10.1039/d0sc05095d), 2020-10-30
Supplement: d0sc05095d1.pdf [file d0sc05095d1.pdf]

# **Aggregation-Induced Phosphorescence Sensitization in Two Heptanuclear and Decanuclear Gold-Silver Sandwich Clusters**

Zhou Lu,<sup>†ab</sup> Yu-Jie Yang,<sup>†c</sup> Wen-Xiu Ni,<sup>d</sup> Mian Li,<sup>c</sup> Yifang Zhao,<sup>a</sup> Yong-Liang Huang,<sup>a</sup> Dong Luo,<sup>a</sup> Xiaoping Wang,<sup>c</sup> Mohammad A. Omary,<sup>\*b</sup> and Dan Li<sup>\*a</sup>

---

<sup>a</sup> College of Chemistry and Materials Science, Guangdong Provincial Key Laboratory of Functional Supramolecular Coordination Materials and Applications, Jinan University, Guangzhou 510632, P. R. China.  
Email: danli@jnu.edu.cn

<sup>b</sup> Department of Chemistry, University of North Texas, 1155 Union Circle #305070, Denton, Texas 76203, United States. Email: omary@unt.edu

<sup>c</sup> Department of Chemistry, Shantou University, Guangdong 515063, P. R. China.

<sup>d</sup> Department of Chemistry, Shantou University Medical College, Shantou, Guangdong 515041, P. R. China.

<sup>e</sup> Neutron Scattering Division, Oak Ridge National Laboratory, Oak Ridge, Tennessee 37831-6475, United States.

<sup>†</sup>. Z.L. and Y.-J.Y contributed to this work equally.

## Experimental Section

### Materials and Physical Measurements

All starting materials were purchased from commercial sources and used as received without further purification. Fourier-transform infrared (FT-IR) spectra were measured using a Nicolet Avatar 360 FT-IR spectrophotometer. Thermogravimetric analysis (TGA) was carried out in a nitrogen stream using TA Instruments Q50 TGA thermal analysis equipment with a heating rate of 10 °C min<sup>-1</sup>. Solution UV-vis absorption spectra were recorded on an Agilent UV-vis spectrometer 8453 and a Perkin-Elmer Lambda 900 UV/Vis/NIR spectrometer; solid-state UV-Vis absorption spectra were recorded on a Bio-Logic MOS-500 multifunctional circular dichroism spectrometer. Mass spectra were obtained on an Applied Biosystems 4800 Plus MALDI TOF Analyzer (ABI) spectrometer using  $\alpha$ -Cyano-4-hydroxycinnamic acid (CHCA) as matrix. Elemental analyses were performed by Elementar vario EL Cube equipment. X-ray photoelectron spectroscopies (XPS) were obtained Thermo Fisher Scientific ESCALAB 250Xi (monochrome Al K $\alpha$   $h\nu = 1486.6$  eV, power = 150 W, beam spot = 500  $\mu$ m, binding energy C1s = 284.8 eV). The dynamic light scattering (DLS) measurements were performed on Malvern Zetasizer Nano-ZS. Energy-dispersive X-ray spectroscopy (EDX) was performed on a scanning electron microscopy (SEM, Zeiss Gemini 300 Field Emission Scanning Electron Microscope) equipped with energy dispersive X-ray spectrometer operated at 15 kV. Powder X-ray diffraction (PXRD) experiments were performed on a Rigaku Ultima IV X-ray diffractometer (Cu K $\alpha$ ,  $\lambda = 1.5418$  Å). NMR studies were conducted by Bruker Ascend 400 MHz and Varian Inova 500 MHz spectrometer and coaxial insert tubes for internal reference technique were adopted for **Au<sub>6</sub>Ag** and **Au<sub>9</sub>Ag**, where inside tube contained two drops of concentrated CH<sub>2</sub>Cl<sub>2</sub> solution of heterobimetallic Au/Ag cluster and outside tube contained blank deuterated chloroform. The reason why we adopted this technique was that both deuterated dichloromethane solutions of heterometallic Au/Ag clusters turned into dark with insoluble black species in several minutes but CH<sub>2</sub>Cl<sub>2</sub> solutions could keep in a good shape for a long time period (*vide infra*, Figure S18). The deuterated dichloromethane was purchased from J&K Scientific, Ltd. (D, 99.8 atom%, Cat. No.: 334919, 10 $\times$ 0.75ML), Cambridge Isotope Laboratories, Inc. (D, 99.8 atom%, item: DLM-23-5 $\times$ 1; D, 99.8 atom% + 0.05% v/v TMS, item: DLM-23TB-10 $\times$ 0.6), and Sigma-Aldrich, Inc. (D, 99.9 atom%, SKU: 444324-10 $\times$ 1ML) to conduct parallel experiments and avoid trace impurity. The study on stability of heterometallic Au/Ag clusters in contacting deuterated solvents is still ongoing.

Room-temperature steady-state photoluminescence spectra (PL) for all samples were recorded on a PTI QM/TM spectrofluorometer (Birmingham, NJ, USA). Corrections of excitation and emission for the detector response were performed ranging from 250-750 nm. Decay curves excited by a N<sub>2</sub> laser at 337 nm were recorded on the same instrument, and lifetimes were calculated using the FelixGX advanced photoluminescence phosphorescence software. Varied-temperature emission spectra were measured on an Edinburgh FLS920 spectrometer equipped with a continuous Xe900 Xenon lamp and a closed cycle cryostat (Advanced Research Systems). The absolute quantum yield was measured at room temperature by employing Hamamatsu C11347-11 absolute PL quantum yield spectrometer. The radiative rate constant is calculated based on the following formula  $k_r$  (s<sup>-1</sup>) =  $\Phi_{PL}/\tau$  and the non-radiative decay rate follows  $k_{nr}$  (s<sup>-1</sup>) = (1- $\Phi_{PL}$ )/ $\tau$ . In solid samples, crystalline samples were used for the photoluminescence measurements. The crystalline phase purity of the samples is assured by elemental analyses and powder X-ray diffraction measurements.

## Characterizations

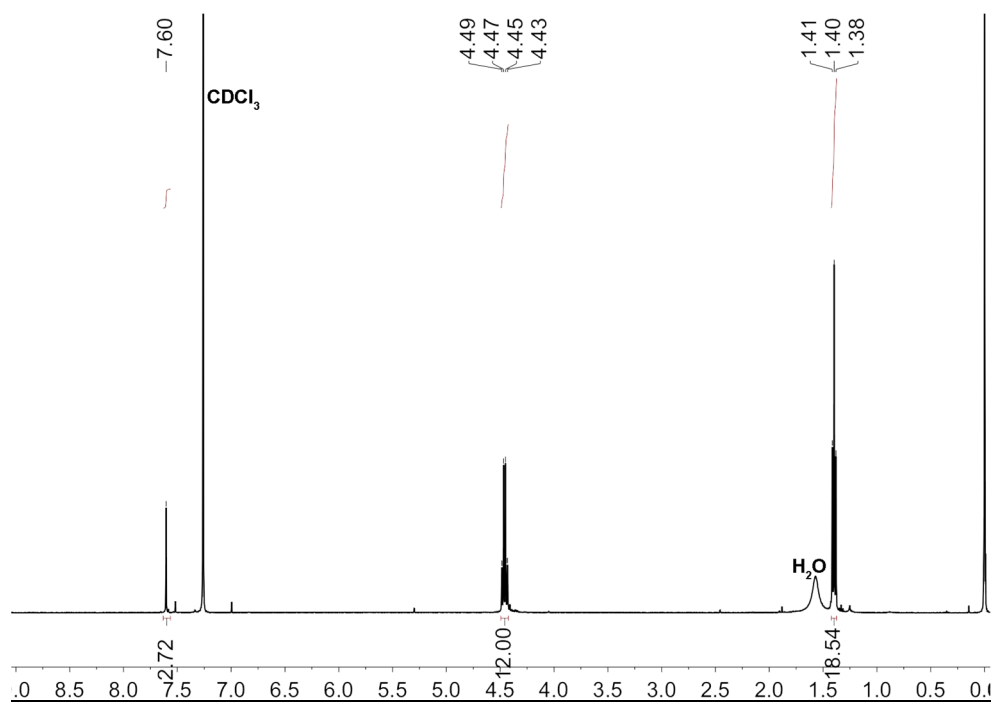

Figure S1. <sup>1</sup>H-NMR spectra of Au<sub>3</sub> in d-chloroform.

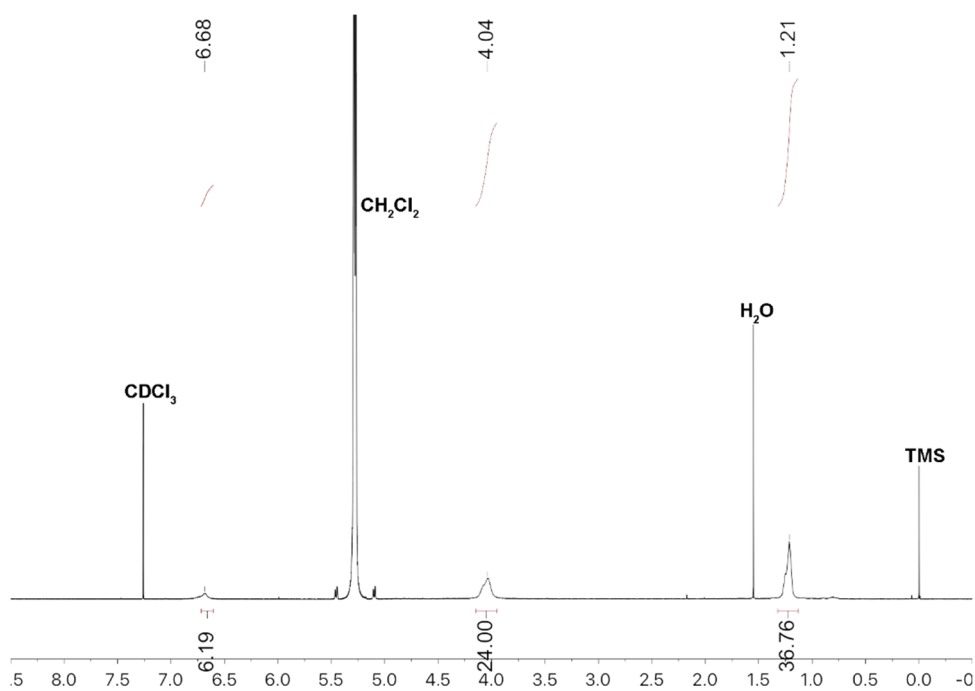

Figure S2. <sup>1</sup>H-NMR spectra of Au<sub>6</sub>Ag in d-chloroform and dichloromethane.

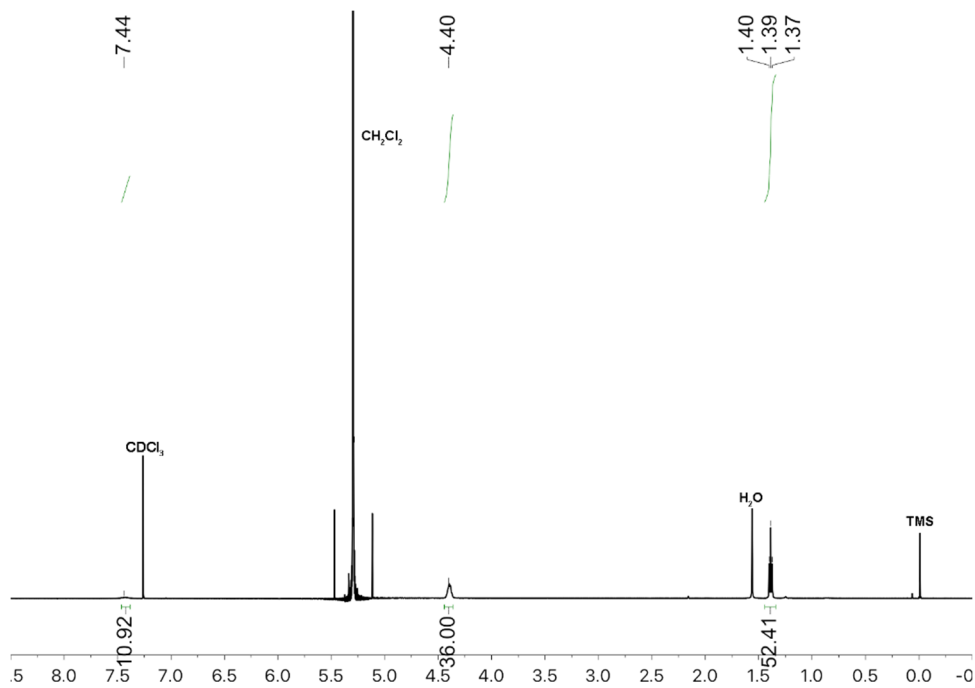

**Figure S3.**  $^1\text{H-NMR}$  spectra of  $\text{Au}_9\text{Ag}$  in d-chloroform and dichloromethane.

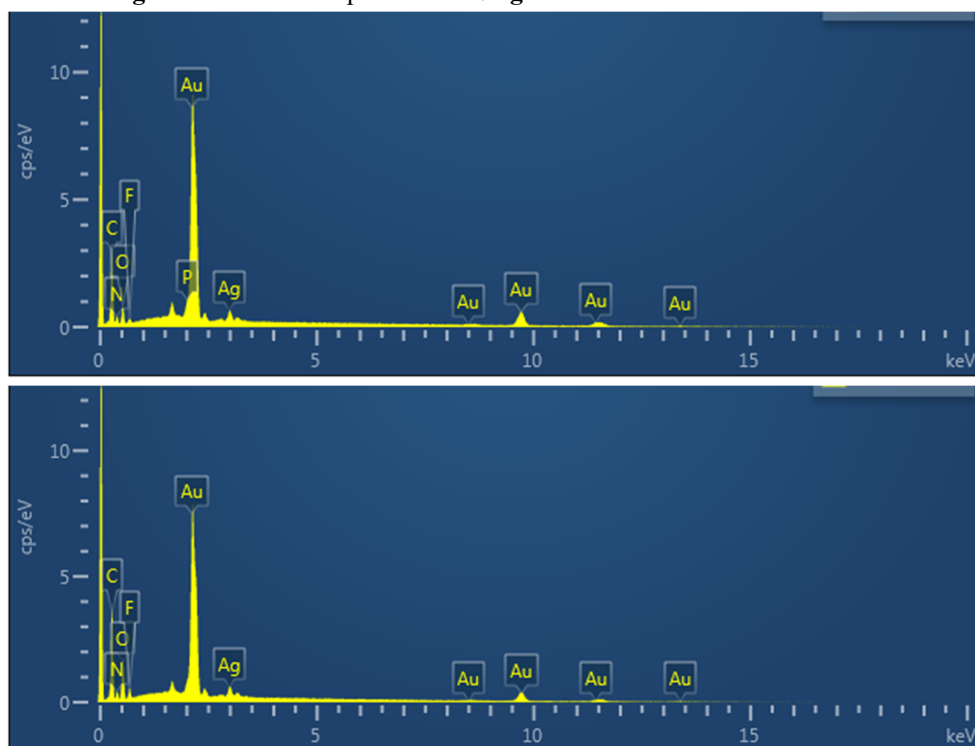

**Figure S4.** Energy-dispersive X-ray spectra (EDX) analysis of (top)  $\text{Au}_6\text{Ag}$  and (bottom)  $\text{Au}_9\text{Ag}$ . Calcd. for  $\text{Au}_6\text{Ag}$  (%): Au, 85.7; Ag, 14.3; Found: Au, 86.3; Ag, 13.7; Calcd. for  $\text{Au}_9\text{Ag}$  (%): Au, 90.0; Ag, 10.0; Found: Au, 89.9; Ag, 10.1.

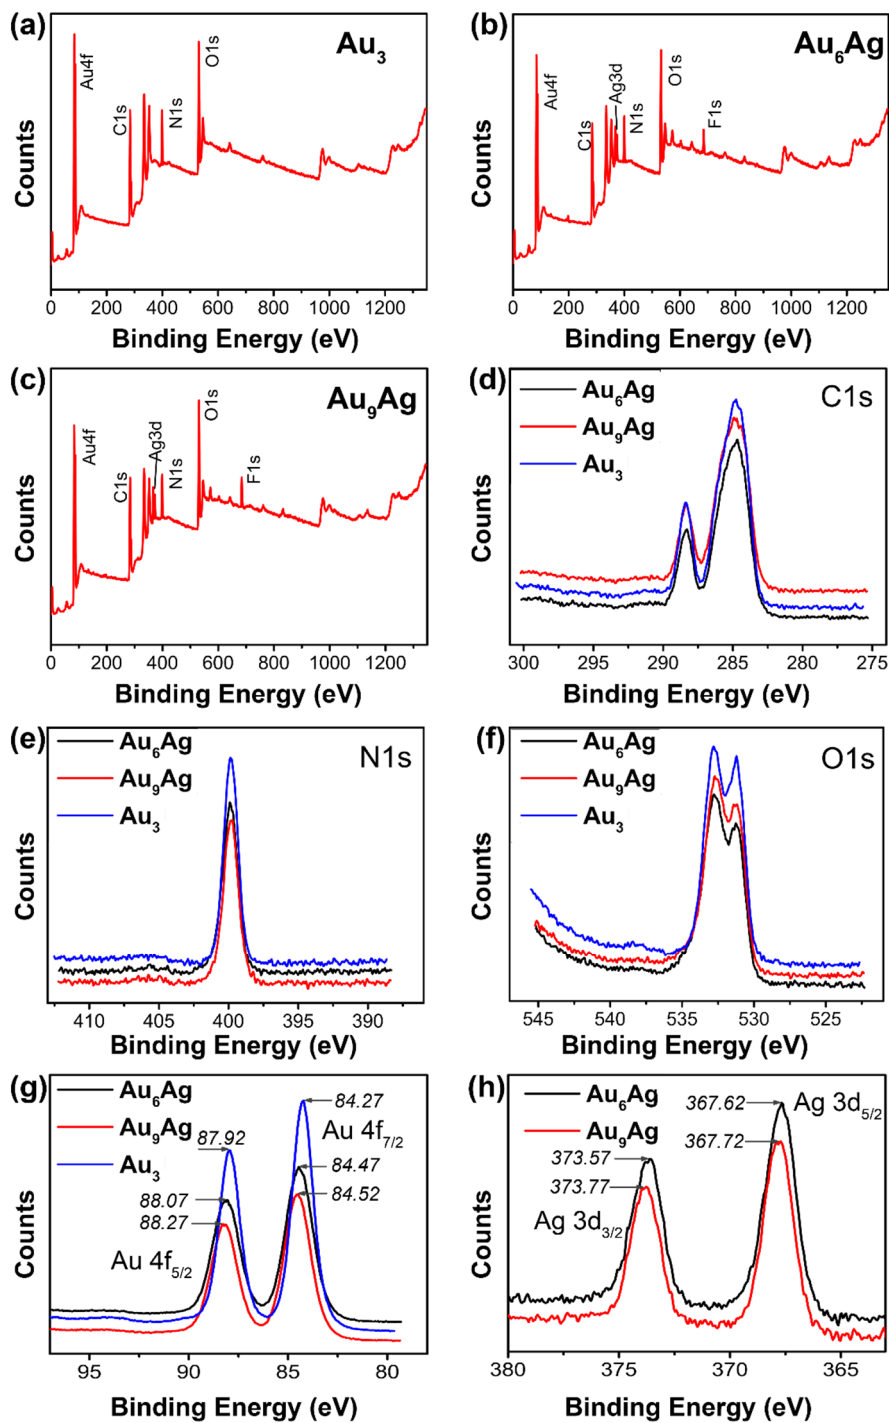

**Figure S5.** XPS spectra of (a)  $\text{Au}_3$ , (b)  $\text{Au}_6\text{Ag}$ , and (c)  $\text{Au}_9\text{Ag}$ . XPS binding energies of (d) C 1s, (e) N 1s, (f) O 1s, (g) Au 4f regions for  $\text{Au}_3$ ,  $\text{Au}_6\text{Ag}$ , and  $\text{Au}_9\text{Ag}$ . XPS binding energies of (h) Ag 3d region for  $\text{Au}_6\text{Ag}$  and  $\text{Au}_9\text{Ag}$ .

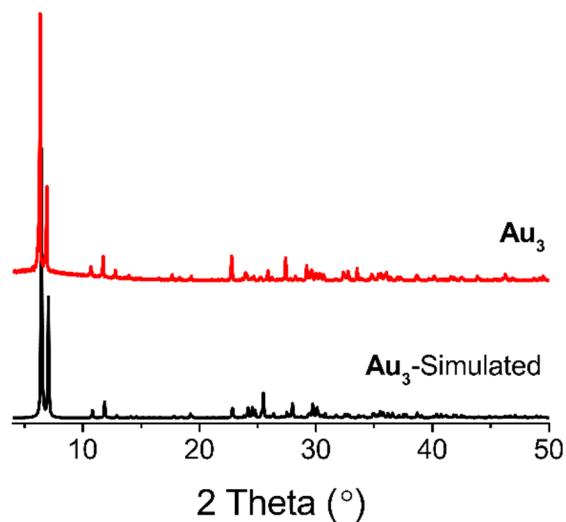

**Figure S6.** PXR D patterns for (black) simulated and (red) as-synthesized of  $\text{Au}_3$ .

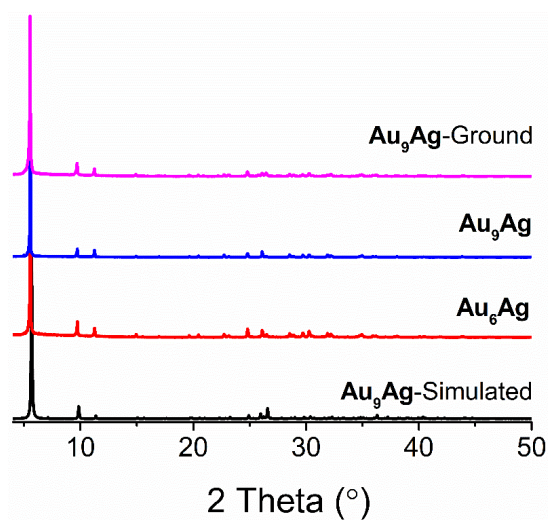

**Figure S7.** PXR D patterns for (black) simulated, (blue) as-synthesized and (magenta) ground sample of  $\text{Au}_9\text{Ag}$  and for (red) as-synthesized of  $\text{Au}_6\text{Ag}$ .

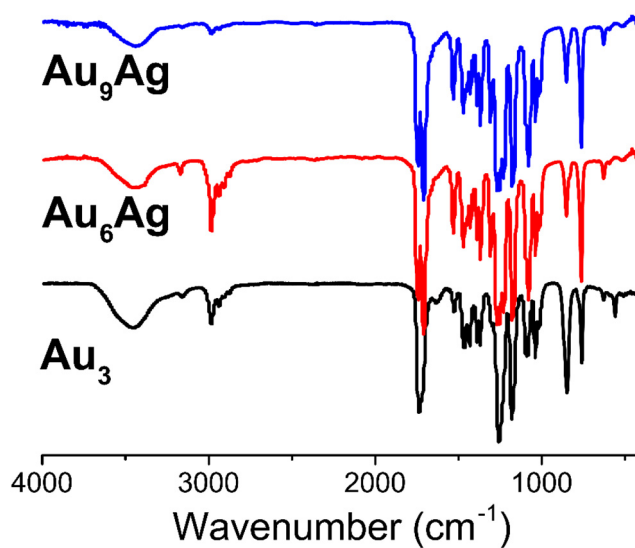

**Figure S8.** FT-IR spectra of  $\text{Au}_3$ ,  $\text{Au}_6\text{Ag}$ , and  $\text{Au}_9\text{Ag}$ .

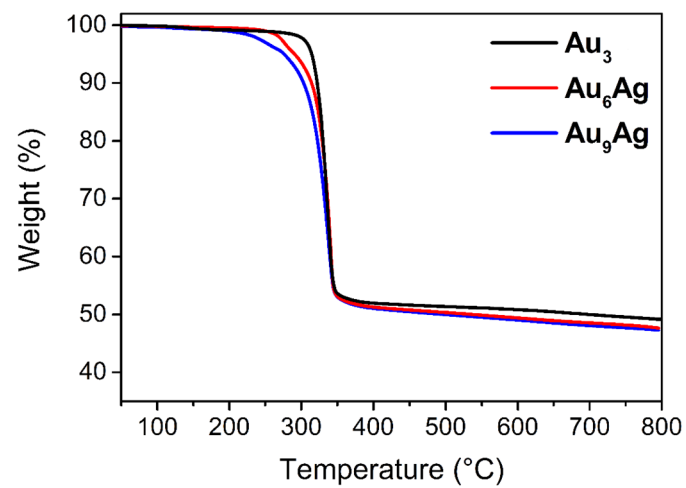

**Figure S9.** Thermogravimetric analysis (TGA) curves of Au<sub>3</sub>, Au<sub>6</sub>Ag, and Au<sub>9</sub>Ag.

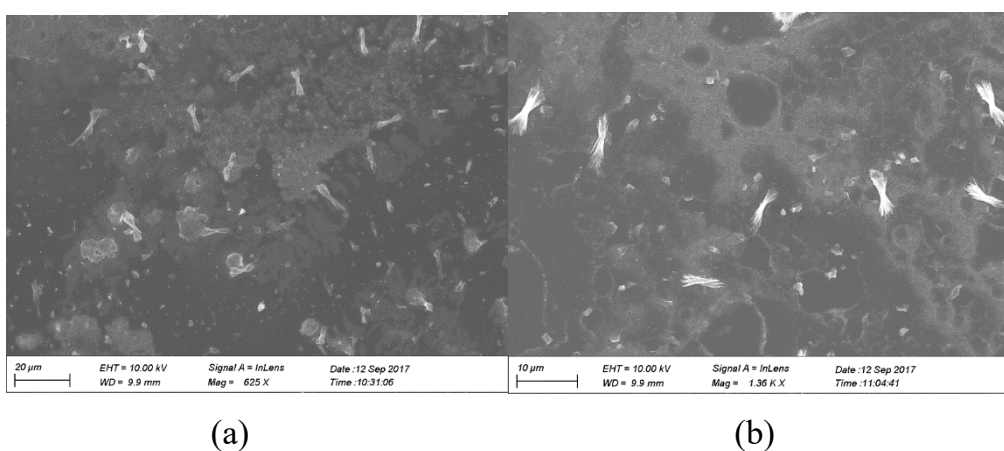

**Figure S10.** Scanning electron microscope (SEM) images prepared from the 0.1 mM CH<sub>2</sub>Cl<sub>2</sub> solution of (a) Au<sub>6</sub>Ag and (b) Au<sub>9</sub>Ag.

## Crystallographic Study

**Table S1.** Summary of crystal data and structure refinement parameters for **Au<sub>3</sub>**, **Au<sub>9</sub>Ag**, and **Au<sub>6</sub>Ag**.

| sample                                                                             | <b>Au<sub>3</sub></b>                                                          | <b>Au<sub>9</sub>Ag</b>                                                                           | <b>Au<sub>6</sub>Ag</b>                                                                           |
|------------------------------------------------------------------------------------|--------------------------------------------------------------------------------|---------------------------------------------------------------------------------------------------|---------------------------------------------------------------------------------------------------|
| Empirical formula                                                                  | Au <sub>3</sub> C <sub>27</sub> O <sub>12</sub> N <sub>6</sub> H <sub>33</sub> | Au <sub>9</sub> C <sub>81</sub> O <sub>36</sub> N <sub>18</sub> H <sub>99</sub> AgPF <sub>6</sub> | Au <sub>6</sub> C <sub>54</sub> O <sub>24</sub> N <sub>12</sub> H <sub>66</sub> AgPF <sub>6</sub> |
| CCDC No.                                                                           | 1968678                                                                        | 1968679                                                                                           | -                                                                                                 |
| Formula weight                                                                     | 1224.49                                                                        | 3926.31                                                                                           | 2701.81                                                                                           |
| Temperature (K)                                                                    | 293.00(10)                                                                     | 293(2)                                                                                            | 100(2)                                                                                            |
| Crystal system                                                                     | monoclinic                                                                     | hexagonal                                                                                         | hexagonal                                                                                         |
| Space group                                                                        | <i>P</i> 2 <sub>1</sub> / <i>c</i>                                             | <i>P</i> -6 <sub>2</sub> <i>c</i>                                                                 | <i>P</i> -6                                                                                       |
| <i>a</i> (Å)                                                                       | 8.03090(10)                                                                    | 17.9776(13)                                                                                       | 17.7387(4)                                                                                        |
| <i>b</i> (Å)                                                                       | 16.3497(2)                                                                     | 17.9776(13)                                                                                       | 17.7387(4)                                                                                        |
| <i>c</i> (Å)                                                                       | 25.1896(3)                                                                     | 20.5845(14)                                                                                       | 33.7730(10)                                                                                       |
| $\beta$ (°)                                                                        | 94.2110(10)                                                                    | -                                                                                                 | -                                                                                                 |
| Volume (Å <sup>3</sup> )                                                           | 3298.54(7)                                                                     | 5761.5(9)                                                                                         | 9203.3(5)                                                                                         |
| Z                                                                                  | 4                                                                              | 2                                                                                                 | 6                                                                                                 |
| D <sub>calcd.</sub> (g/cm <sup>3</sup> )                                           | 2.466                                                                          | 2.263                                                                                             | 2.529                                                                                             |
| F (000)                                                                            | 2280.0                                                                         | 3652.0                                                                                            | 6565.0                                                                                            |
| $\mu$ (mm <sup>-1</sup> )                                                          | 25.203                                                                         | 11.681                                                                                            | 24.813                                                                                            |
| 2 $\theta$ range for data collection (°)                                           | 6.45 - 148.302                                                                 | 7.202 - 52.736                                                                                    | 5.234 - 147.598                                                                                   |
| reflns. collected                                                                  | 20445                                                                          | 28858                                                                                             | 29799                                                                                             |
| Data / restraints / parameters                                                     | 6535 / 0 / 439                                                                 | 4039 / 7 / 274                                                                                    | 10873 / 5 / 70                                                                                    |
| $R_{\text{int}}$                                                                   | 0.0567                                                                         | 0.0321                                                                                            | 0.0521                                                                                            |
| Goodness-of-fit on $F^2$                                                           | 1.053                                                                          | 1.019                                                                                             | 1.682                                                                                             |
| $R_1$ [ $I > 2\sigma(I)$ ] <sup>a</sup> , $wR_2$ [ $I > 2\sigma(I)$ ] <sup>b</sup> | 0.0429, 0.1166                                                                 | 0.0219, 0.0481                                                                                    | 0.1232, 0.3556                                                                                    |
| $R_1$ [all data] <sup>a</sup> , $wR_2$ [all data] <sup>b</sup>                     | 0.0488, 0.1208                                                                 | 0.0311, 0.0511                                                                                    | 0.1438, 0.3931                                                                                    |

<sup>a</sup>  $R_1 = \sum |F_o| - |F_c| / \sum |F_o|$ . <sup>b</sup>  $wR_2 = \{[\sum w(F_o^2 - F_c^2)^2] / \sum [w(F_o^2)^2]\}^{1/2}$ ;  $w = 1 / [\sigma^2(F_o^2) + (aP)^2 + bP]$ , where  $P = [\max(F_o^2, 0) + 2F_c^2] / 3$  for all data



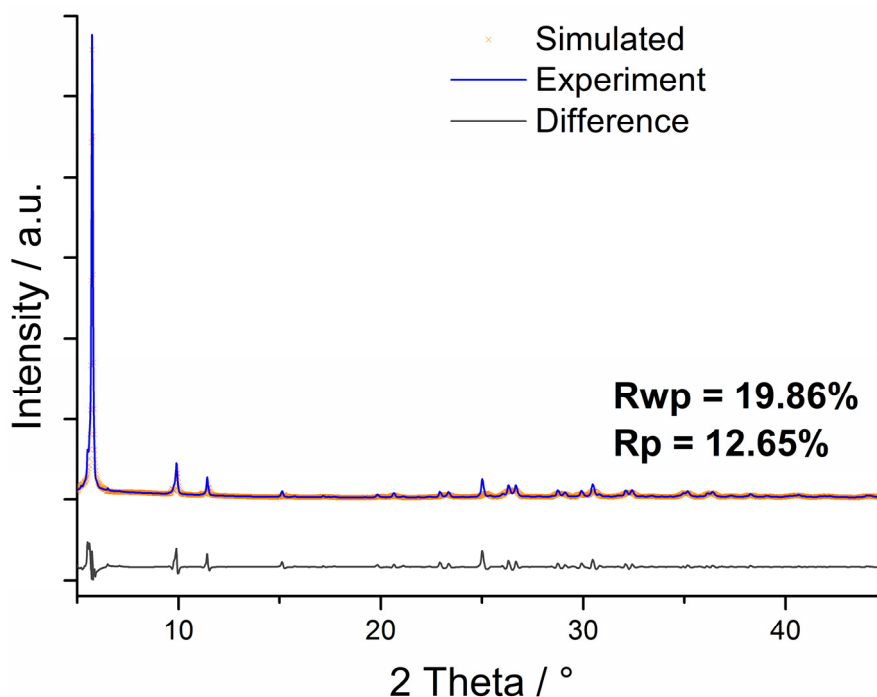

**Figure S11.** Rietveld refinement of PXR patterns of **Au<sub>6</sub>Ag** under 298 K.

**Table S2.** Comparison of selected bond length (Å) for **Au<sub>3</sub>**, **Au<sub>9</sub>Ag**, and **Au<sub>6</sub>Ag**.

|                                      | <b>Au<sub>3</sub></b> | <b>Au<sub>9</sub>Ag#1</b> | <b>Au<sub>9</sub>Ag#2</b> | <b>Au<sub>6</sub>Ag</b> |
|--------------------------------------|-----------------------|---------------------------|---------------------------|-------------------------|
| Au-N                                 | 2.012(6),             |                           |                           |                         |
|                                      | 2.017(6),             | 2.011(10),                | 2.002(8),                 |                         |
|                                      | 2.026(6),             | 2.016(8),                 | 2.010(8),                 | - <sup>a</sup>          |
|                                      | 2.038(6),             | 2.033(9),                 | 2.012(8),                 |                         |
|                                      | 2.039(6),             | 2.047(5)                  | 2.033(9)                  |                         |
|                                      | 2.043(6)              |                           |                           |                         |
| Au-Au<br>(intra-trimer)              |                       |                           |                           | 3.424(5),               |
|                                      |                       |                           |                           | 3.457(6),               |
|                                      | 3.3883(5),            | 3.4186(8),                | 3.4186(8),                | 3.538(7),               |
|                                      | 3.4008(6),            | 3.4886(14)                | 3.456(7)                  | 3.548(5),               |
|                                      | 3.4180(5)             |                           |                           | 3.574(6)                |
| Au-Au<br>(inter-trimer) <sup>b</sup> |                       |                           |                           | 3.705(8),               |
|                                      |                       |                           |                           | 3.705(19),              |
| Au-Au<br>(inter-trimer) <sup>b</sup> | 3.3676(4),            |                           | 3.175(6),                 | 3.210(2)                |
|                                      | 3.5097(5)             | 3.2756(4)                 | 3.649(3)                  |                         |
| Au-Ag                                |                       |                           |                           | 2.641(7),               |
|                                      |                       |                           |                           | 2.644(2),               |
|                                      |                       |                           |                           | 2.647(2),               |
|                                      |                       | 2.7871(7)                 | 2.617(5),                 | 2.679(3),               |
|                                      |                       |                           | 2.735(7)                  | 2.679(6),               |
|                                      |                       |                           |                           | 2.688(7),               |
|                                      |                       |                           |                           | 2.691(3),               |
|                                      |                       |                           | 2.713(6)                  |                         |

<sup>a</sup> In **Au<sub>6</sub>Ag**, the positions of ligand could not be determined by single-crystal X-ray crystallography due to disordering. <sup>b</sup> Only inter-trimer Au-Au distances shorter than 4.0 Å are under consideration.

**Table S3.** Selected bond angles ( $^{\circ}$ ) of **Au<sub>3</sub>**.

|                    |           |                    |           |
|--------------------|-----------|--------------------|-----------|
| N(1)-Au(1)-Au(2)#1 | 85.07(16) | N(6)-Au(1)-Au(2)#1 | 94.79(17) |
| N(6)-Au(1)-N(1)    | 179.7(3)  | N(5)-Au(3)-N(4)    | 176.8(2)  |
| N(2)-Au(2)-Au(1)#1 | 95.60(16) | N(2)-Au(2)-N(3)    | 176.6(2)  |
| N(3)-Au(2)-Au(1)#1 | 87.81(17) |                    |           |

Symmetry code: #1 2-x,1-y,1-z

**Table S4.** Selected bond angles ( $^{\circ}$ ) of **Au<sub>9</sub>Ag**.

|                     |          |                    |          |
|---------------------|----------|--------------------|----------|
| N(2)#2-Au(1)-N(1)   | 178.5(4) | N(2)-N(1)-Au(1)    | 118.3(8) |
| N(3)-Au(2Ab)-N(4)#2 | 164.8(3) | N(1)-N(2)-Au(1)#3  | 123.2(8) |
| N(4)-N(3)-Au(2)     | 121.9(6) | N(4)-N(3)-Au(2A)   | 120.6(6) |
| N(3)-N(4)-Au(2)#3   | 121.5(6) | N(3)-N(4)-Au(2A)#3 | 121.2(6) |

Symmetry codes: #1 +y,+x,1-z; #2 1+y-x,2-x,+z; #3 2-y,1+x-y,+z; #4 +x,+y,1/2-z;  
#5 +y-x,1-x,+z; #6 1-y,1+x-y,+z; #7 +y-x,1-x,1/2-z; #8 1-y,1+x-y,1/2-z

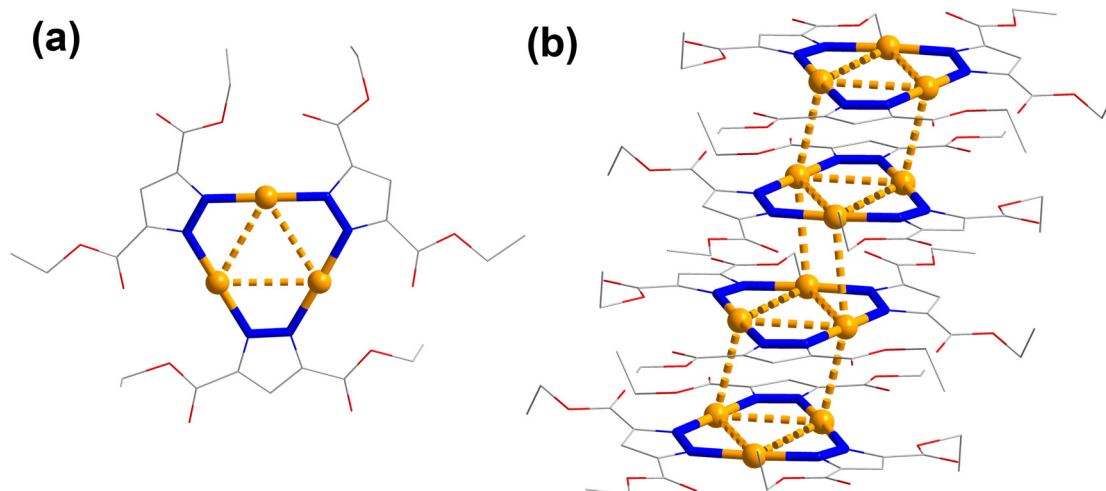**Figure S12.** (a) Asymmetric unit of **Au<sub>3</sub>** crystal structure at 293 K. (b) Packing diagram of **Au<sub>3</sub>**. Colour representations: yellow, gold; blue, nitrogen; grey, carbon; red, oxygen. Hydrogen atoms are omitted from the figure for clarity.

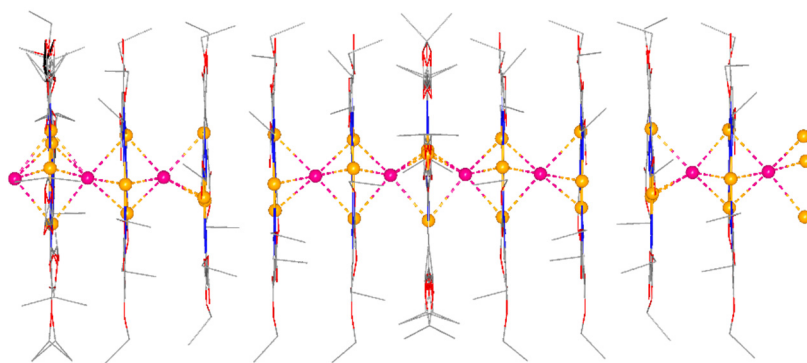

**Figure S13.** Packing diagram of  $\text{Au}_6\text{Ag}$  at 100 K. Note that all silver cations are partially occupied; three of four silver atoms are half occupied and the remaining one silver atom is fully occupied. Colour representations: yellow, gold; magenta, silver; blue, nitrogen; grey, carbon; red, oxygen. Hydrogen atoms and counter-anions are omitted from the figure for clarity.

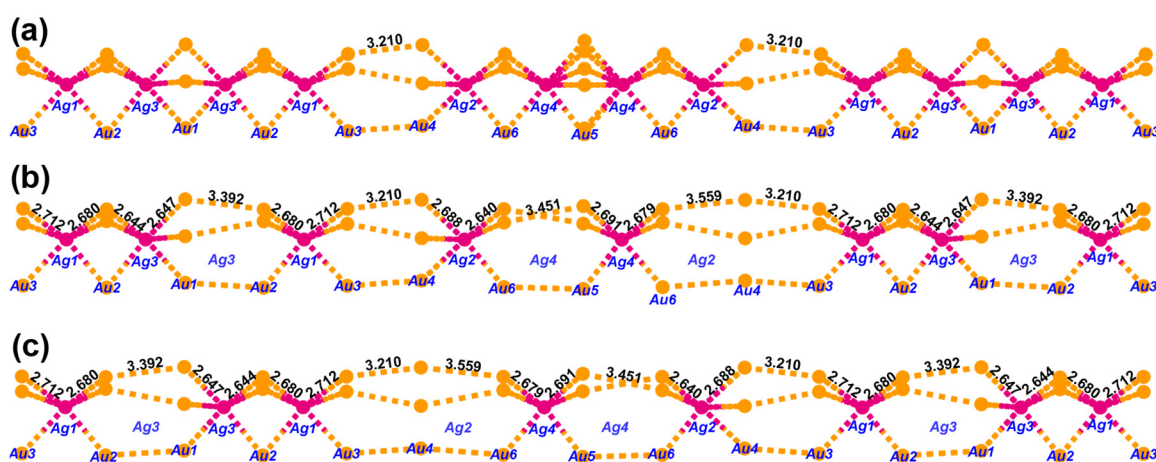

**Figure S14.** Distribution of Ag atoms in the gold-silver clusters of  $\text{Au}_6\text{Ag}$ . (a) Structure from X-ray diffraction. Silver atoms except Ag1 are half-occupied. (b, c) Local structures showing the two possible arrangements of silver atoms along the crystallographic  $c$ -direction with alternating  $\{3 \text{ Au}_6\text{Ag}, 1 \text{ Au}_3\}$  and  $\{1 \text{ Au}_9\text{Ag}_2, 1 \text{ Au}_3\}$  and  $\{3 \text{ Au}_6\text{Ag}\}$  clusters as the repeating unit. The disordered Au atom (Au5B) and the ligands were omitted for clarity.

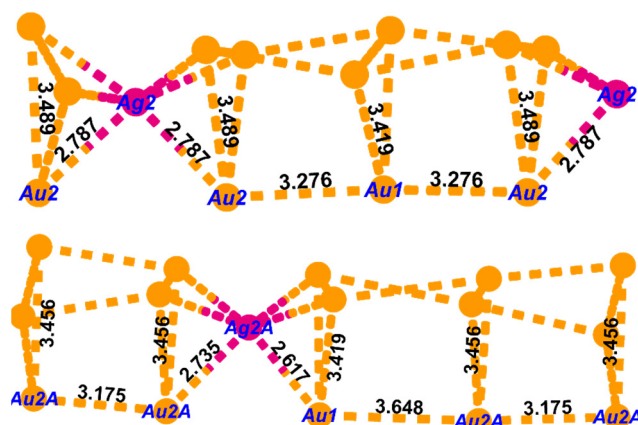

**Figure S15.** Illustrations of two different disordering sets of  $\text{Au}_9\text{Ag}$  (Colour representations: yellow, gold; magenta, silver. Ligands and counter-anions are omitted from the figures for clarity).

## Photolumuminescence Measurement

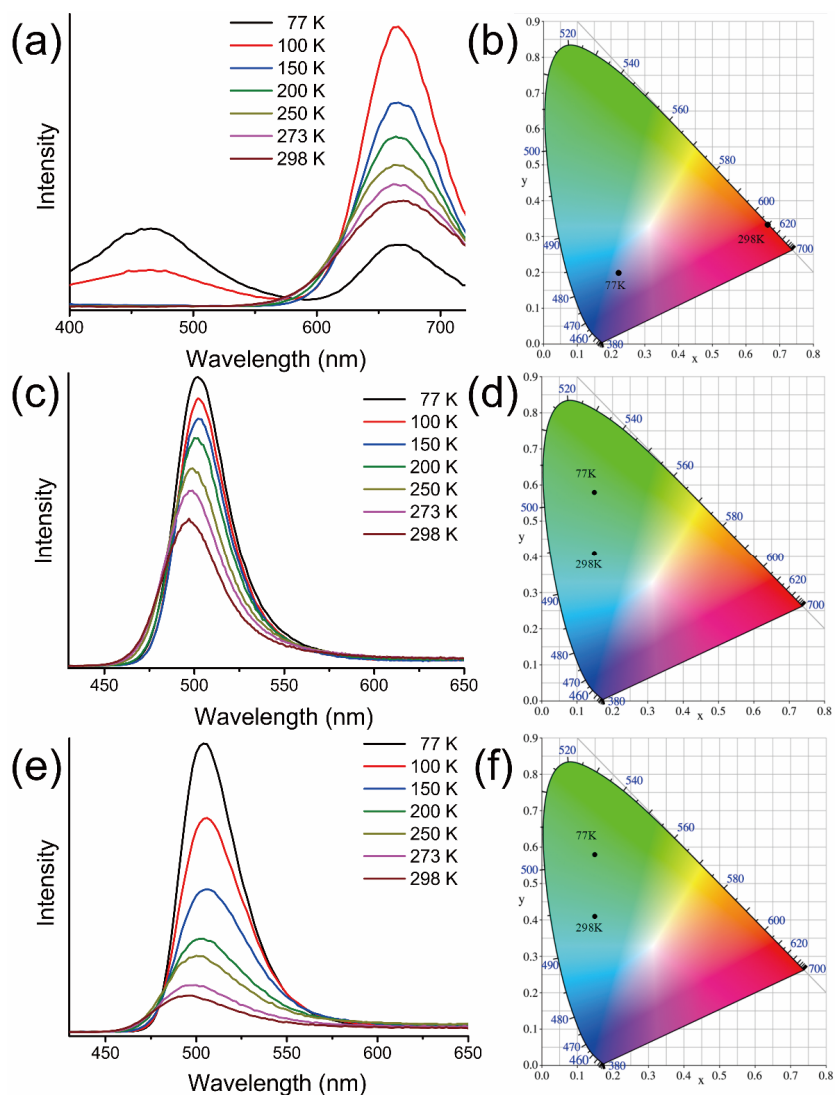

**Figure S16.** Varied-temperature solid-state emission spectra of (a)  $\text{Au}_3$  (Ex = 300 nm), (c)  $\text{Au}_6\text{Ag}$  (Ex = 360 nm), and (e)  $\text{Au}_9\text{Ag}$  (Ex = 360 nm). Emission colour profiles of (b)  $\text{Au}_3$ , (d)  $\text{Au}_6\text{Ag}$ , and (f)  $\text{Au}_9\text{Ag}$  in CIE-1931 chromaticity diagram at 298 K and 77 K.

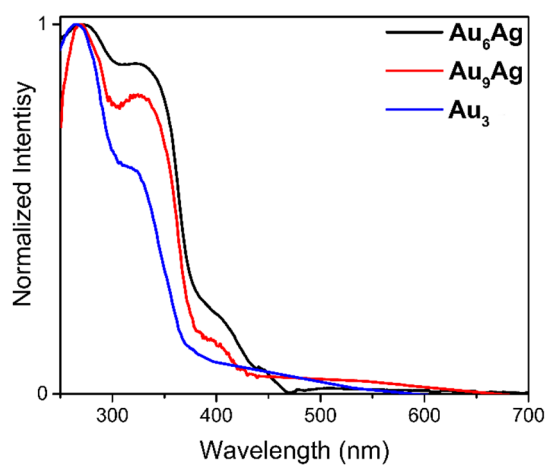

**Figure S17.** Solid state UV-vis spectra of three nanoclusters.

**Table S5.** Solid-state photoluminescence data of **Au<sub>3</sub>**, **Au<sub>6</sub>Ag**, and **Au<sub>9</sub>Ag**.

| Sample                  | $\lambda_{\text{ex}}$ (nm) | $\lambda_{\text{em}}$ (nm) | $\Phi_{\text{PL}}^a$ [RT / 77 K] (%) | $\tau^b$ ( $\mu\text{s}$ ) |
|-------------------------|----------------------------|----------------------------|--------------------------------------|----------------------------|
| <b>Au<sub>3</sub></b>   | 351                        | 670                        | 67.5 / 78.8                          | 15.32                      |
| <b>Au<sub>6</sub>Ag</b> | 354                        | 496                        | 43.9 / 95.2                          | 9.31                       |
| <b>Au<sub>9</sub>Ag</b> | 370                        | 496                        | 12.0 / 39.1                          | 9.11                       |

<sup>a</sup> Absolute photoluminescence quantum yield. <sup>b</sup> Emission lifetime.

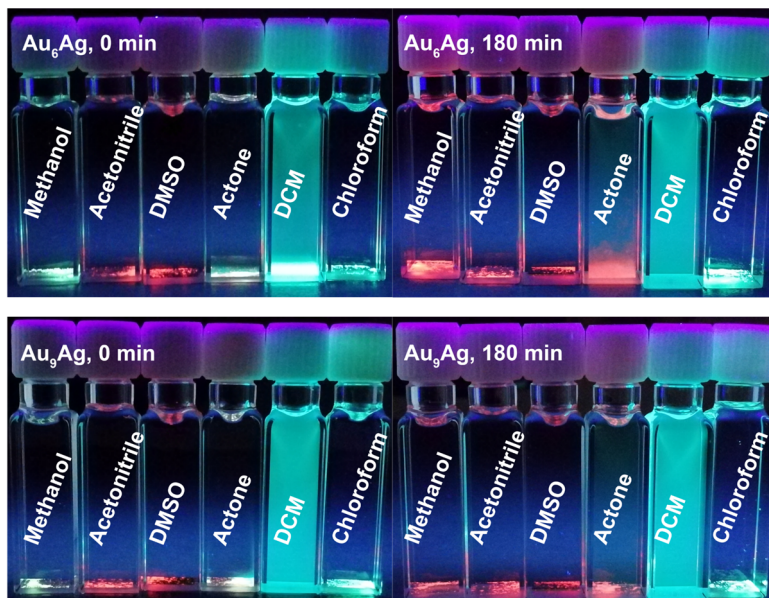

**Figure S18.** Digital photographs for the crystals of (top) **Au<sub>6</sub>Ag** and (bottom) **Au<sub>9</sub>Ag** immersing in different solvents (methanol, acetonitrile, DMSO, acetone, DCM, and chloroform, from left to right, respectively) under 365-nm hand-held

UV lamp. It is clear to see that upon adding methanol, acetonitrile, DMSO, and acetone, the heterometallic Au/Ag clusters turns into white powder in a short time, assuming the lability of sandwich-like structures in high-polar solvents. Only DCM solution of both **Au<sub>6</sub>Ag** and **Au<sub>9</sub>Ag** could keep in a good shape for a long time period and the crystals remain well in chloroform.

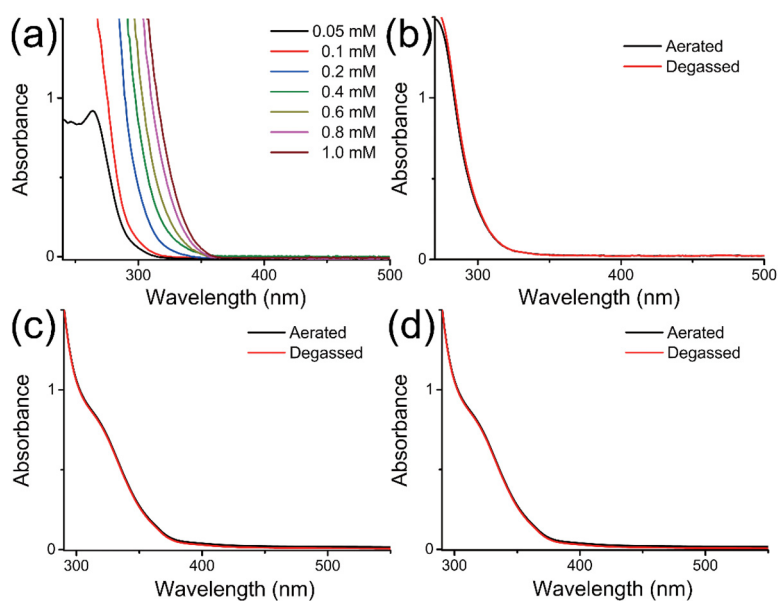

**Figure S19.** (a) Varied-concentration UV-vis absorption spectra of aerated **Au<sub>3</sub>**  $\text{CH}_2\text{Cl}_2$  solution. UV-vis absorption spectra of aerated and degassed 0.1 mM (b) **Au<sub>3</sub>**, (c) **Au<sub>6</sub>Ag**, and (d) **Au<sub>9</sub>Ag**  $\text{CH}_2\text{Cl}_2$  solution.

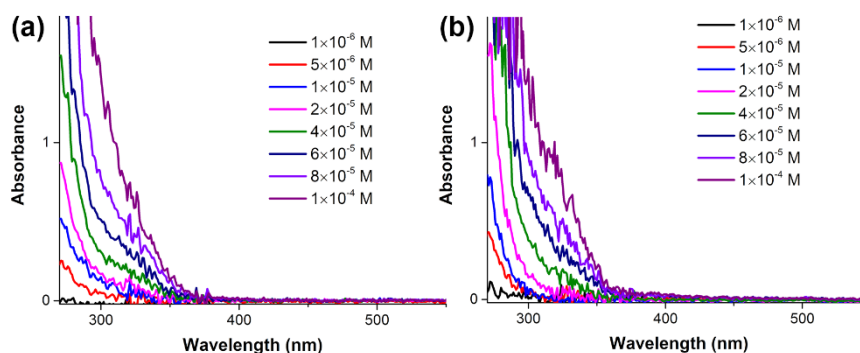

**Figure S20.** UV-vis absorption spectra for (a) **Au<sub>6</sub>Ag** and (b) **Au<sub>9</sub>Ag** at the concentrations ranging from  $1 \times 10^{-6}$  M to  $1 \times 10^{-4}$  M in  $\text{CH}_2\text{Cl}_2$ .

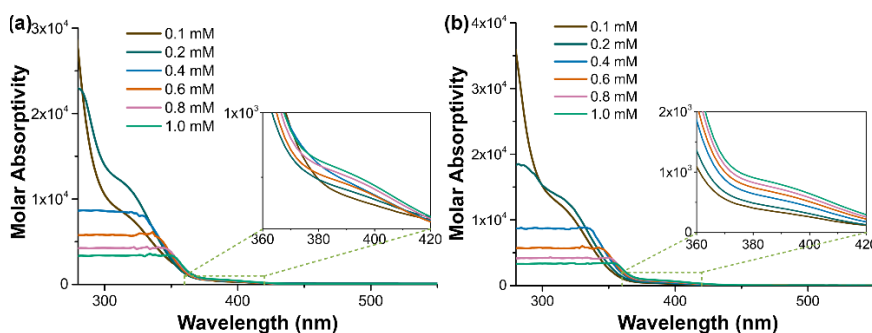

**Figure S21.** Molar absorptivity versus concentration of (a) **Au<sub>6</sub>Ag** and (b) **Au<sub>9</sub>Ag**  $\text{CH}_2\text{Cl}_2$  solution at ambient temperature in the  $10^{-4}$  M range. The inset zooms the wavelength region from 360 to 420 nm.

The aggregations of sandwich metal cluster in solutions give rise of deviation of Beer's Law, and oligomerization progress for **Au<sub>x</sub>Ag** ( $x = 6; 9$ ) could be represented by eq. 1, with an equilibrium constant given by eq. 2. The differences between the highest absorption peak and low-energy absorption peak are as large as of  $6,337 \text{ cm}^{-1}$  for **Au<sub>6</sub>Ag** and  $6,225 \text{ cm}^{-1}$  for **Au<sub>9</sub>Ag**, which are also reasonable for monomer-dimer difference.

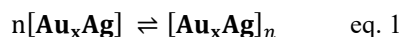

$$K_{1n} = c_n / c_1^n \quad \text{eq. 2}$$

Based on original expression of Beer's Law and eq. 2, the following eq. 3 could be derived by assumption of the appearance of dimer in solutions. The fitting curves and parameters are enclosed in Figures 3b and S21c. Detailed derivation and expression could refer to M. A. Rawashdeh-Omary, M. A. Omary, H. H. Patterson, *J. Am. Chem. Soc.* **2000**, *122*, 10371-10380.  $c_0$  is initial concentration;  $A$  is the absorbance for selected wavelength;  $\epsilon_n$  is the molar extinction coefficient of the  $n$ -mer;  $b$  is the light path (1 cm here).

$$c_0 A^{-\frac{1}{n}} = \left(\frac{n}{\epsilon_n b}\right) A^{\frac{n-1}{n}} + (K_{1n} \epsilon_n b)^{-\frac{1}{n}} \quad \text{eq. 3}$$

**Table S6.** Summary of equilibrium constants and free energies of **Au<sub>6</sub>Ag** and **Au<sub>9</sub>Ag** in  $\text{CH}_2\text{Cl}_2$  solution at 298 K.

| Species                 | Equilibrium constant $K_{\text{eq}}$ | Free energy $\Delta G$ (298 K, $\text{kJ mol}^{-1}$ ) |
|-------------------------|--------------------------------------|-------------------------------------------------------|
| <b>Au<sub>6</sub>Ag</b> | $1.35 \times 10^4 \text{ M}^{-1}$    | -23.6                                                 |
| <b>Au<sub>9</sub>Ag</b> | $1.89 \times 10^3 \text{ M}^{-1}$    | -18.7                                                 |

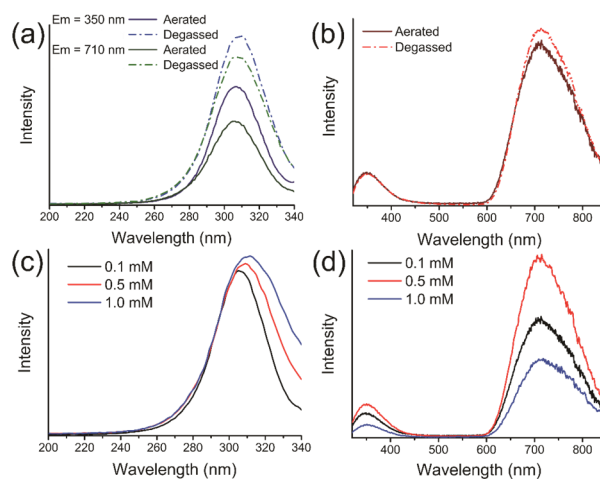

**Figure S22.** (a) Excitation spectra and (b) emission spectra of  $\text{Au}_3$   $\text{CH}_2\text{Cl}_2$  solution at the concentration of 0.1 mM in aerated and degassed situation. (c) Varied-concentration excitation spectra ( $E_m = 710$  nm) and (d) emission spectra ( $E_x = 310$  nm) of aerated  $\text{Au}_3$   $\text{CH}_2\text{Cl}_2$  solution.

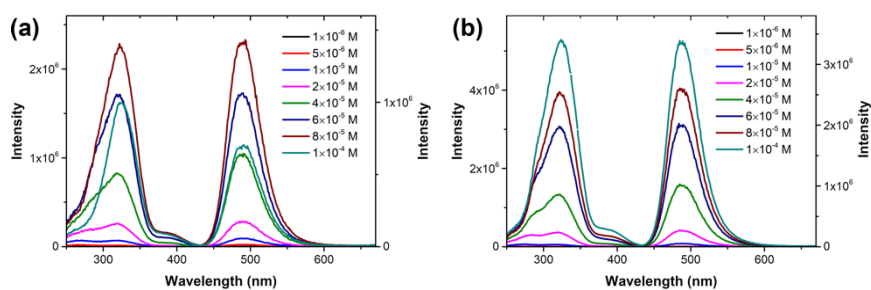

**Figure S23.** Varied-concentration excitation and emission spectra for (a)  $\text{Au}_6\text{Ag}$  and (b)  $\text{Au}_9\text{Ag}$  from the concentration range of  $1 \times 10^{-6}$  M to  $1 \times 10^{-4}$  M in  $\text{CH}_2\text{Cl}_2$ . The excitation wavelength is 300 nm and the emission wavelength is recorded at 490 nm.

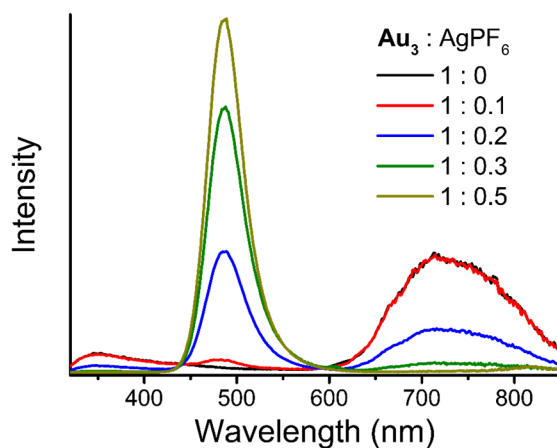

**Figure S24.** Emission Spectra of 0.1 mM different molar ratio of  $\text{Au}_3/\text{AgPF}_6$  in  $\text{CH}_2\text{Cl}_2$  solution ( $E_x = 310$  nm).

**Table S7.** Absolute photoluminescence quantum yields ( $\Phi_{\text{PL}}$ ) of three nanoclusters in solid states.

| Sample                            | Area of absorbance | Area of emission | $\Phi_{\text{PL}}$ / % | $\Phi_{\text{PL, avg}}$ / % | Sample                           | Area of absorbance | Area of emission | $\Phi_{\text{PL}}$ / % | $\Phi_{\text{PL, avg}}$ / % |
|-----------------------------------|--------------------|------------------|------------------------|-----------------------------|----------------------------------|--------------------|------------------|------------------------|-----------------------------|
| $\text{Au}_6\text{Ag}$ ,<br>298 K | 51610112           | 22682631         | 43.95                  | $\pm 0.16$                  | $\text{Au}_6\text{Ag}$ ,<br>77 K | 8465519            | 8078675          | 95.43                  | 95.22<br>$\pm 0.19$         |
|                                   | 51517930           | 22674902         | 44.01                  |                             |                                  | 8395455            | 7981554          | 95.07                  |                             |
|                                   | 51452398           | 22486467         | 43.70                  |                             |                                  | 8402608            | 7995525          | 95.16                  |                             |

|                                    |          |          |       |        |                                   |         |         |       |         |
|------------------------------------|----------|----------|-------|--------|-----------------------------------|---------|---------|-------|---------|
| <b>Au<sub>9</sub>Ag</b> ,<br>298 K | 22127140 | 2665666  | 12.05 | 12.03  | <b>Au<sub>9</sub>Ag</b> ,<br>77 K | 9447314 | 3664965 | 38.79 | 39.08   |
|                                    | 22106361 | 2674536  | 12.10 | ± 0.09 |                                   | 9318154 | 3661416 | 39.29 | ± 0.26  |
|                                    | 22111145 | 2637489  | 11.93 |        |                                   | 9335304 | 3656789 | 39.17 |         |
| <b>Au<sub>3</sub></b> ,<br>298 K   | 22509314 | 15248334 | 67.74 | 67.48  | <b>Au<sub>3</sub></b> ,<br>77 K   | 7750306 | 6042756 | 77.97 | 78.79 ± |
|                                    | 22660114 | 15306749 | 67.55 | ± 0.30 |                                   | 7577026 | 6050305 | 79.85 | 0.96    |
|                                    | 22661086 | 15217176 | 67.15 |        |                                   | 7709682 | 6056491 | 78.56 |         |

**Table S8.** Absolute photoluminescence quantum yields ( $\Phi_{\text{PL}}$ ) of heterobimetallic nanoclusters in the solution.<sup>a</sup>

| Concentration / mM      | Area of absorbance | Area of emission | $\Phi_{\text{PL}}$ / % | $\Phi_{\text{PL, avg}}$ / % | Concentration / mM | Area of absorbance | Area of emission | $\Phi_{\text{PL}}$ / % | $\Phi_{\text{PL, avg}}$ / % |
|-------------------------|--------------------|------------------|------------------------|-----------------------------|--------------------|--------------------|------------------|------------------------|-----------------------------|
| <b>Au<sub>6</sub>Ag</b> |                    |                  |                        |                             |                    |                    |                  |                        |                             |
| 0.01                    | 74810814           | 4137316          | 5.53                   | 5.52                        | 0.05               | 110889936          | 23026397         | 20.77                  | 20.73                       |
|                         | 74917834           | 4132701          | 5.52                   | ± 0.01                      |                    | 110855306          | 22973864         | 20.72                  | ± 0.03                      |
|                         | 74809097           | 4121080          | 5.51                   |                             |                    | 110884007          | 22963920         | 20.71                  |                             |
| 0.1                     | 140545799          | 37864526         | 26.94                  | 26.96                       | 0.2                | 145816804          | 45979174         | 31.53                  | 31.56                       |
|                         | 140561195          | 37919119         | 26.98                  | ± 0.02                      |                    | 145811715          | 46012195         | 31.56                  | ± 0.04                      |
|                         | 140547200          | 37870492         | 26.95                  |                             |                    | 145830560          | 46089327         | 31.60                  |                             |
| 0.4                     | 146473898          | 62737211         | 42.83                  | 42.80                       | 0.6                | 148048994          | 76656305         | 51.78                  | 51.78                       |
|                         | 146488927          | 62662914         | 42.78                  | ± 0.03                      |                    | 148052818          | 76608571         | 51.74                  | ± 0.05                      |
|                         | 146486345          | 62672101         | 42.78                  |                             |                    | 148064597          | 76740031         | 51.83                  |                             |
| 0.8                     | 146532232          | 73531006         | 50.18                  | 50.19                       | 1.0                | 27485141           | 16621814         | 60.48                  | 60.58                       |
|                         | 146546109          | 73618317         | 50.24                  | ± 0.04                      |                    | 27432589           | 16672441         | 60.78                  | ± 0.17                      |
|                         | 146527558          | 73494605         | 50.16                  |                             |                    | 27488810           | 16627400         | 60.49                  |                             |
| 0.1 (degassed)          | 127975892          | 32836773         | 25.66                  | 25.36                       |                    |                    |                  |                        |                             |
|                         | 127834847          | 32248035         | 25.23                  | ± 0.26                      |                    |                    |                  |                        |                             |
|                         | 127832507          | 32207727         | 25.20                  |                             |                    |                    |                  |                        |                             |
| <b>Au<sub>9</sub>Ag</b> |                    |                  |                        |                             |                    |                    |                  |                        |                             |
| 0.01                    | 70562062           | 6211009          | 8.80                   | 8.80                        | 0.05               | 126010235          | 30800673         | 24.44                  | 24.43                       |
|                         | 70487697           | 6198576          | 8.79                   | ± 0.02                      |                    | 126039089          | 30799129         | 24.44                  | ± 0.01                      |
|                         | 70470152           | 6216310          | 8.82                   |                             |                    | 126029092          | 30779483         | 24.42                  |                             |
| 0.1                     | 146903366          | 49927218         | 33.99                  | 33.98                       | 0.2                | 147556632          | 53696703         | 36.39                  | 36.37                       |
|                         | 146885952          | 49917962         | 33.98                  | ± 0.02                      |                    | 147542547          | 53701998         | 36.40                  | ± 0.04                      |
|                         | 146895562          | 49886777         | 33.96                  |                             |                    | 147558690          | 53596887         | 36.32                  |                             |
| 0.4                     | 149221108          | 60992117         | 40.87                  | 40.85                       | 0.6                | 150587343          | 54949514         | 36.49                  | 36.43                       |
|                         | 149206952          | 61019425         | 40.90                  | ± 0.07                      |                    | 150585131          | 54825400         | 36.41                  | ± 0.05                      |
|                         | 149203433          | 60836211         | 40.77                  |                             |                    | 150580602          | 54815382         | 36.40                  |                             |
| 0.8                     | 149332966          | 58985095         | 39.50                  | 39.50                       | 1.0                | 147406353          | 50367480         | 34.17                  | 34.15                       |
|                         | 149318215          | 58937893         | 39.47                  | ± 0.04                      |                    | 147388025          | 50350616         | 34.16                  | ± 0.03                      |
|                         | 149331323          | 59040148         | 39.54                  |                             |                    | 147389249          | 50293912         | 34.12                  |                             |
| 0.1 (degassed)          | 137833729          | 45051851         | 32.69                  | 32.68                       |                    |                    |                  |                        |                             |
|                         | 137839714          | 45042703         | 32.68                  | ± 0.01                      |                    |                    |                  |                        |                             |
|                         | 137849121          | 45034393         | 32.67                  |                             |                    |                    |                  |                        |                             |

<sup>a</sup> All measurements were performed in undegassed dichloromethane solution under room temperature if not specifically informed.



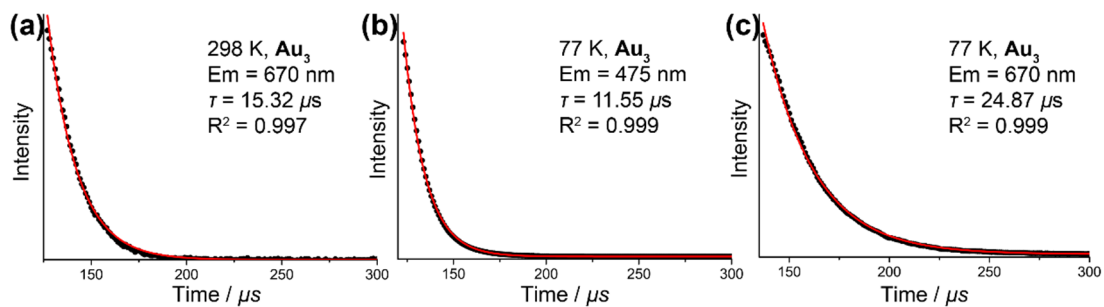

**Figure S25.** Emission decay profiles of  $\text{Au}_3$  in the solid state under (a) 298 K and (b-c) 77K.

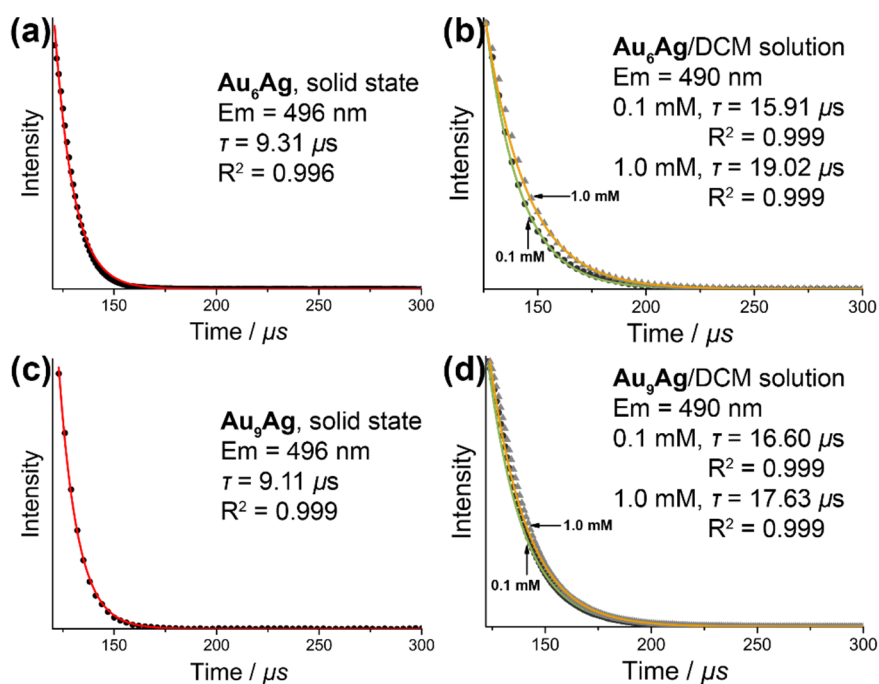

**Figure S26.** Emission decay profiles of (a-b)  $\text{Au}_6\text{Ag}$  and (c-d)  $\text{Au}_9\text{Ag}$  in the solid state and solution, respectively.

# Computational Section

## Computational Details

All initial models were taken from X-ray crystallography data. Dimer of  $\text{Au}_3$  was taken from crystal at 293 K with shortest inter-molecular Au-Au distance of 3.368 Å; both  $\text{Au}_6\text{Ag}$  and  $\text{Au}_9\text{Ag}$  units were taken from one set of disorder structure omitting counteranions, replacing ethoxycarbonyl with methoxycarbonyl groups since these parts have little contributions to electronic transitions and thus denoted as  $\text{Au}_6\text{Ag}^*$  and  $\text{Au}_9\text{Ag}^*$ , respectively. Geometry optimizations were performed by Amsterdam Modeling Suite (AMS 2018) program package<sup>1</sup> at the level of Grimme's D3-dispersion-corrected<sup>2</sup> PBE functional<sup>3,4</sup> with Becke-Johnson (BJ) damping<sup>5</sup> and slater-type triple-zeta polarity (TZP) basis set,<sup>6</sup> using small frozen core approximation. No imaginary frequencies were observed in all optimized structures to confirm the minima on the energy surface. Energy decomposition analysis-natural orbitals for chemical valence (EDA-NOCV)<sup>7-9</sup> calculations were conducted at the level of PBE-D3(BJ) functional and TZP basis sets with none frozen core, in which the interaction energies ( $\Delta E_{\text{int}}$ ) between two fragments were decomposed to Pauli repulsions ( $\Delta E_{\text{Pauli}}$ ), electrostatic interactions ( $\Delta E_{\text{Elstat}}$ ), orbital interactions ( $\Delta E_{\text{Orb}}$ ), and dispersion correction energies ( $\Delta E_{\text{Disp}}$ ). Relativistic effects were considered by apply zeroth-order regular approximation (ZORA) to the full relativistic effect treated in Dirac equation.<sup>10</sup>

Time-dependent density functional theory (TDDFT) calculations were performed by Gaussian 16 A.03 software package<sup>11</sup> using PBE0 functional<sup>12,13</sup> with the effective core potential (ECP) of Lanl2dz basis set<sup>14,15</sup> for metal atoms and 6-31G(d,p) basis set<sup>16</sup> for non-metal atoms. The first 20  $S_0 \rightarrow S_n$  and first 10  $S_0 \rightarrow T_n$  vertical transitions were calculated for each model. All molecular orbital maps and electron density difference (EDD) maps of singlet-singlet spin-allowed ( $S_0 \rightarrow S_n$ ) and singlet-triplet spin-forbidden ( $S_0 \rightarrow T_n$ ) transitions were generated by Multiwfn 3.6 software<sup>17</sup> using the formatted checkpoint file (.fchk files) and the Gaussian output file (.out files). The isovalue of contour is 0.02 a.u. for molecular orbitals (MOs) and  $5 \times 10^{-4}$  a.u. for EDA-NOCV deformation density and EDD maps. Abbreviations in this section:  $f$ , oscillator strength; HOMO or H, highest occupied molecular orbital; LUMO or L, lowest unoccupied molecular orbital; MLCT, metal-to-ligand charge transfer; ILCT, inter-ligand charge transfer; MC, metal-centred.

## Computational Results

**Scheme S1.** Energy level diagram for all four models.

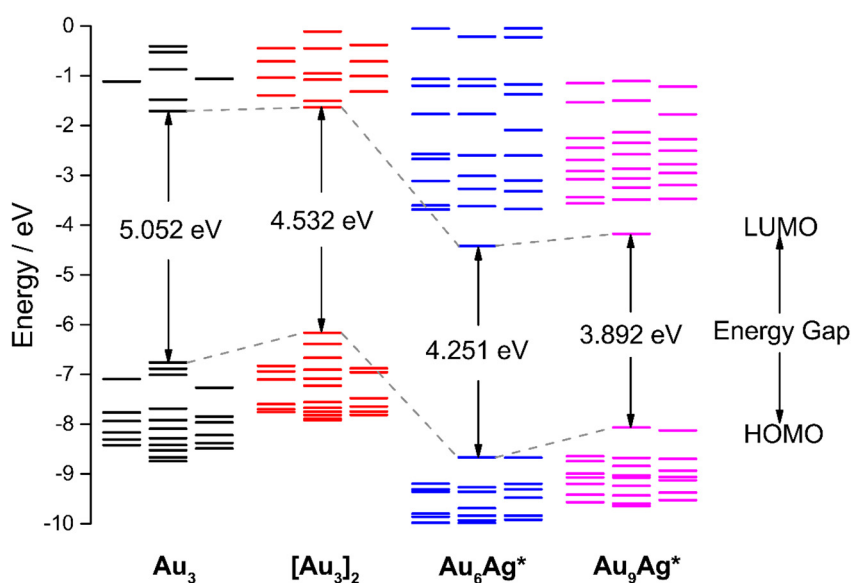

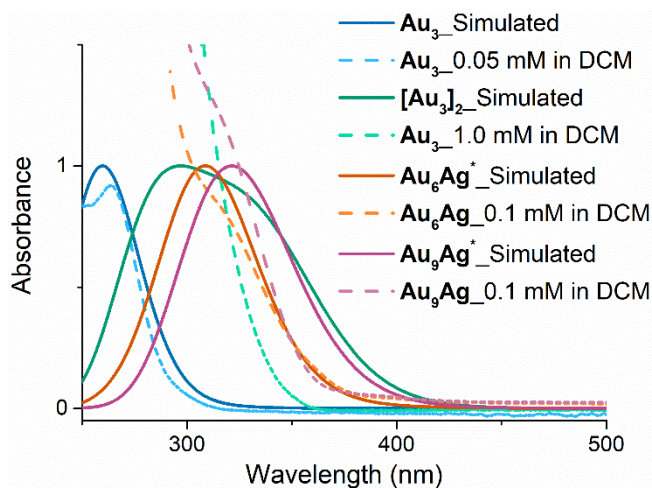

**Figure S27.** Comparison of experimental and simulated UV-vis absorption spectra for  $\text{Au}_3$ ,  $[\text{Au}_3]_2$ ,  $\text{Au}_6\text{Ag}^+$ , and  $\text{Au}_9\text{Ag}^+$ .

**Table S9.** Energy decomposition analysis (EDA) results for heterobimetallic nanocluster. (unit: kcal/mol)

| Fragment 1                 | $\text{Au}_6\text{Ag}^*$ |                            |                     | $\text{Au}_9\text{Ag}^*$   |                                             |
|----------------------------|--------------------------|----------------------------|---------------------|----------------------------|---------------------------------------------|
|                            | $[\text{Au}_3]_2^*$      | $\text{Au}_3^*\text{Ag}^+$ | $[\text{Au}_3]_3^*$ | $[\text{Au}_3]_2^*$        | $[\text{Au}_3]^*\text{Ag}^+[\text{Au}_3]^*$ |
| Fragment 2                 | $\text{Ag}^+$            | $\text{Au}_3^*$            | $\text{Ag}^+$       | $\text{Au}_3^*\text{Ag}^+$ | $\text{Au}_3^*$                             |
| $\Delta E_{\text{Pauli}}$  | 128.0                    | 131.2                      | 125.3               | 135.4                      | 101.0                                       |
| $\Delta E_{\text{Elstat}}$ | -134.4                   | -110.2                     | -132.4              | -114.1                     | -75.7                                       |
|                            | (52.2%)                  | (52.1%)                    | (51.1%)             | (50.6%)                    | (47.5%)                                     |
| $\Delta E_{\text{Orb}}$    | -110.6                   | -56.7                      | -113.2              | -60.3                      | -33.1                                       |
|                            | (43.0%)                  | (26.8%)                    | (43.7%)             | (26.8%)                    | (20.7%)                                     |
| $\Delta E_{\text{Disp}}$   | -12.3                    | -44.7                      | -13.5               | -51.0                      | -50.7                                       |
|                            | (4.8%)                   | (21.1%)                    | (5.2%)              | (22.6%)                    | (31.8%)                                     |
| $\Delta E_{\text{Int}}$    | -129.3                   | -80.4                      | -133.8              | -89.1                      | -58.5                                       |

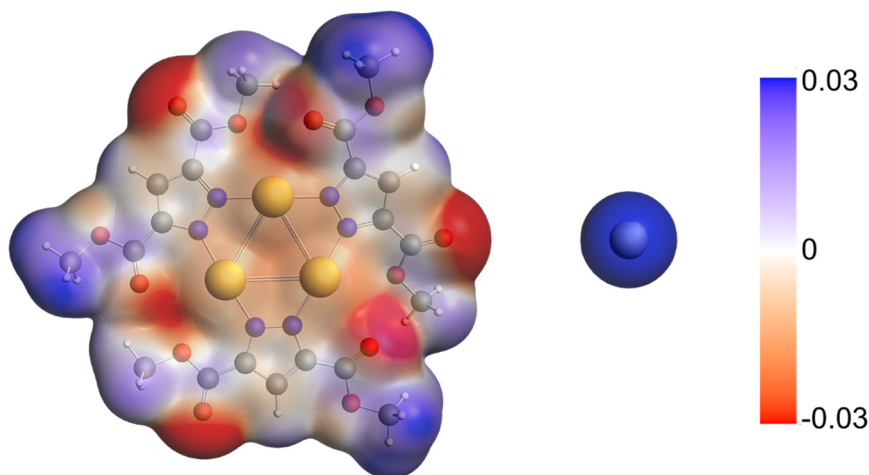

**Figure S28.** Electrostatic potential (ESP) maps for (left)  $\text{Au}_3$  and (right)  $\text{Ag}^+$  species.

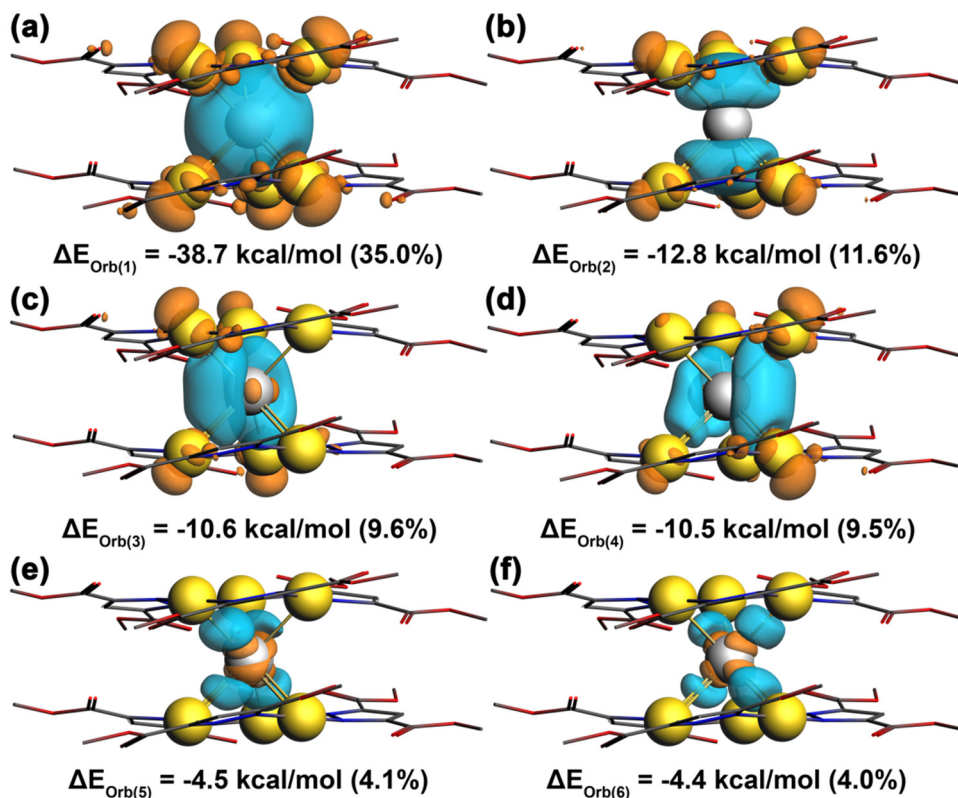

**Figure S29.** Shape of the EDA-NOCV deformation densities (a-f)  $\Delta\rho_{(1)-(6)}$ , which are also associated with the orbital interaction  $\Delta E_{\text{orb}(1)-(6)}$  in  $\text{Au}_6\text{Ag}^*$  and the contribution thereof (in parentheses). The model of  $\text{Au}_6\text{Ag}^*$  (charge: +1) here are separated as  $\text{Ag}^+$  and  $[\text{Au}_3]_2^*$ . The colour code of the electron flow is orange to cyan.

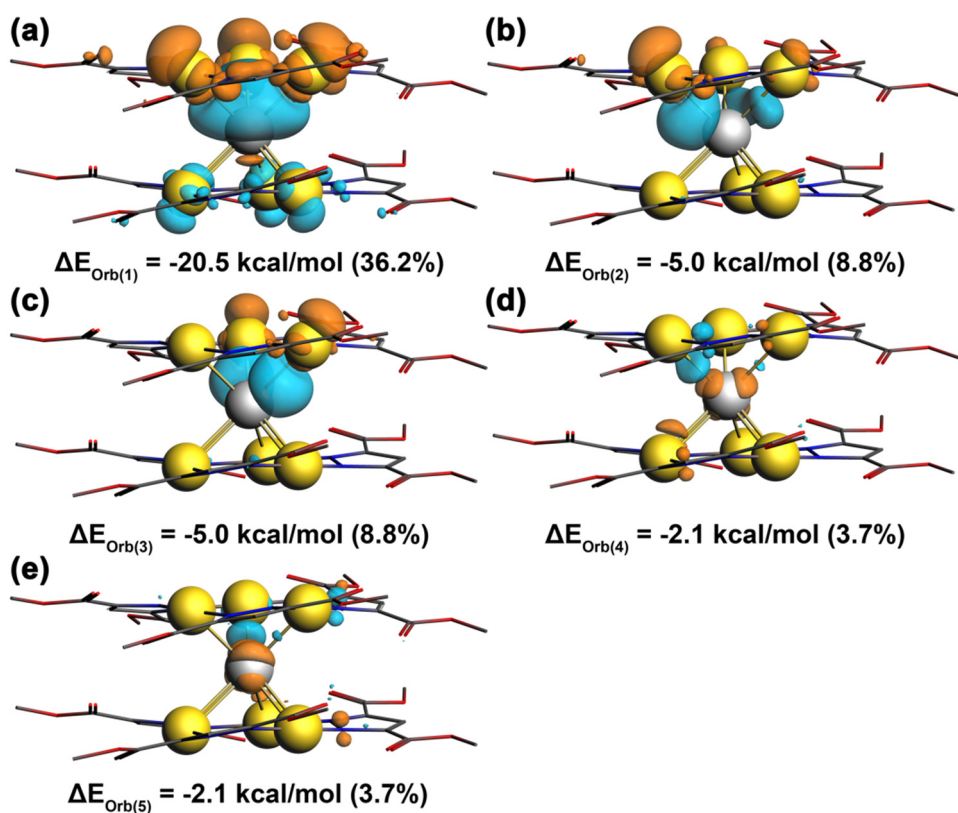

**Figure S30.** Shape of the EDA-NOCV deformation densities (a-e)  $\Delta\rho_{(1)-(5)}$ , which are also associated with the orbital interaction  $\Delta E_{\text{orb}(1)-(5)}$  in  $\text{Au}_6\text{Ag}^*$  and the contribution thereof (in parentheses). The model of  $\text{Au}_6\text{Ag}^*$  (charge: +1) here are separated as  $\text{Au}_3^*\text{Ag}^+$  and  $\text{Au}_3^*$ . The colour code of the electron flow is orange to cyan.

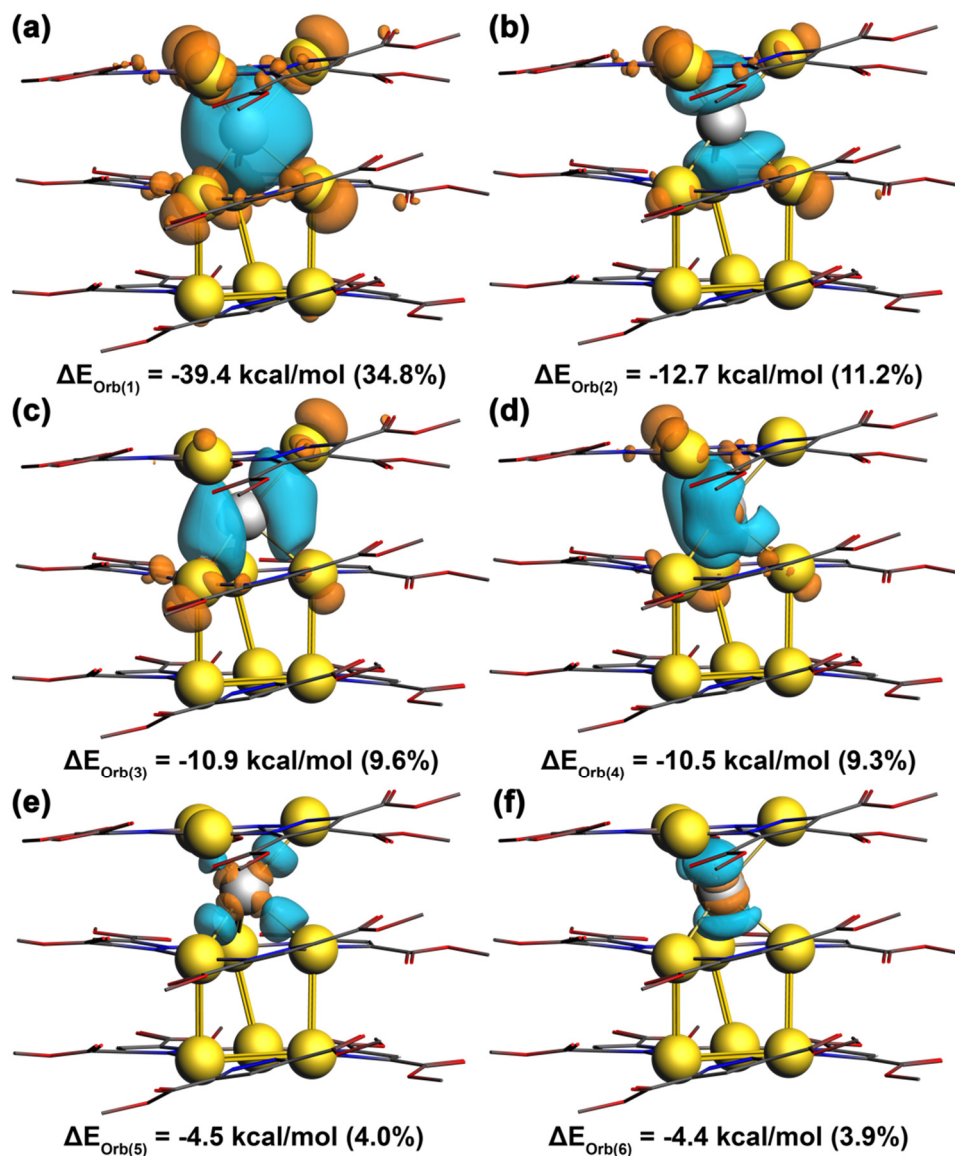

**Figure S31.** Shape of the EDA-NOCV deformation densities (a-f)  $\Delta\rho_{(1)-(6)}$ , which are also associated with the orbital interaction  $\Delta E_{\text{orb}(1)-(6)}$  in  $\text{Au}_9\text{Ag}^*$  and the contribution thereof (in parentheses). The model of  $\text{Au}_9\text{Ag}^*$  (charge: +1) here are separated as  $\text{Ag}^+$  and  $[\text{Au}_3]_3^*$ . The colour code of the electron flow is orange to cyan.

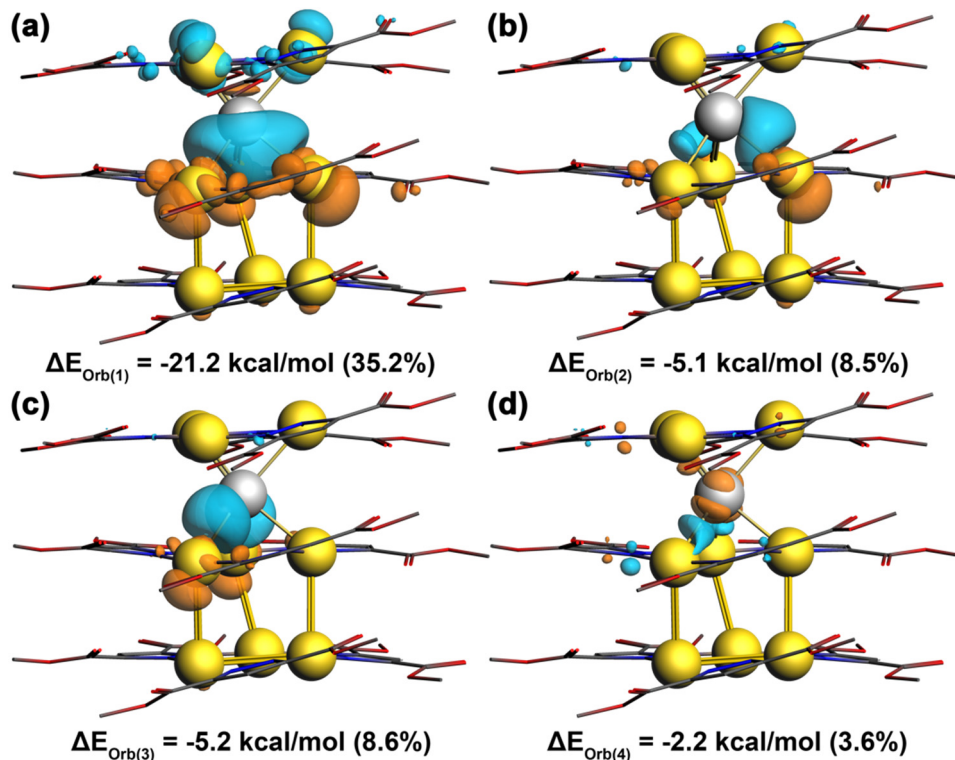

**Figure S32.** Shape of the EDA-NOCV deformation densities (a-d)  $\Delta\rho_{(1)-(4)}$ , which are also associated with the orbital interaction  $\Delta E_{\text{orb}(1)-(4)}$  in  $\text{Au}_9\text{Ag}^*$  and the contribution thereof (in parentheses). The model of  $\text{Au}_9\text{Ag}^*$  (charge: +1) here are separated as  $\text{Au}_3^*\text{Ag}^+$  and  $[\text{Au}_3]_2^*$ . The colour code of the electron flow is orange to cyan.

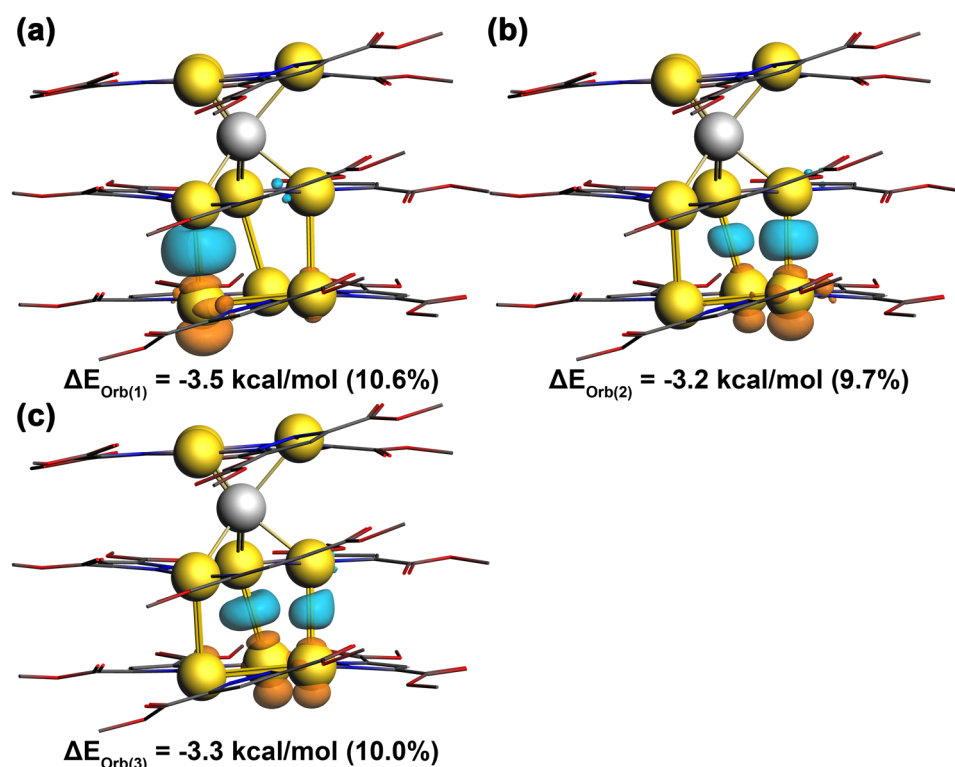

**Figure S33.** Shape of the EDA-NOCV deformation densities (a-c)  $\Delta\rho_{(1)-(3)}$ , which are also associated with the orbital interaction  $\Delta E_{\text{orb}(1)-(3)}$  in  $\text{Au}_9\text{Ag}^*$  and the contribution thereof (in parentheses). The model of  $\text{Au}_9\text{Ag}^*$  (charge: +1) here are separated as  $[\text{Au}_3]^*\text{Ag}^+[\text{Au}_3]^*$  and  $\text{Au}_3$ . The colour code of the electron flow is orange to cyan.

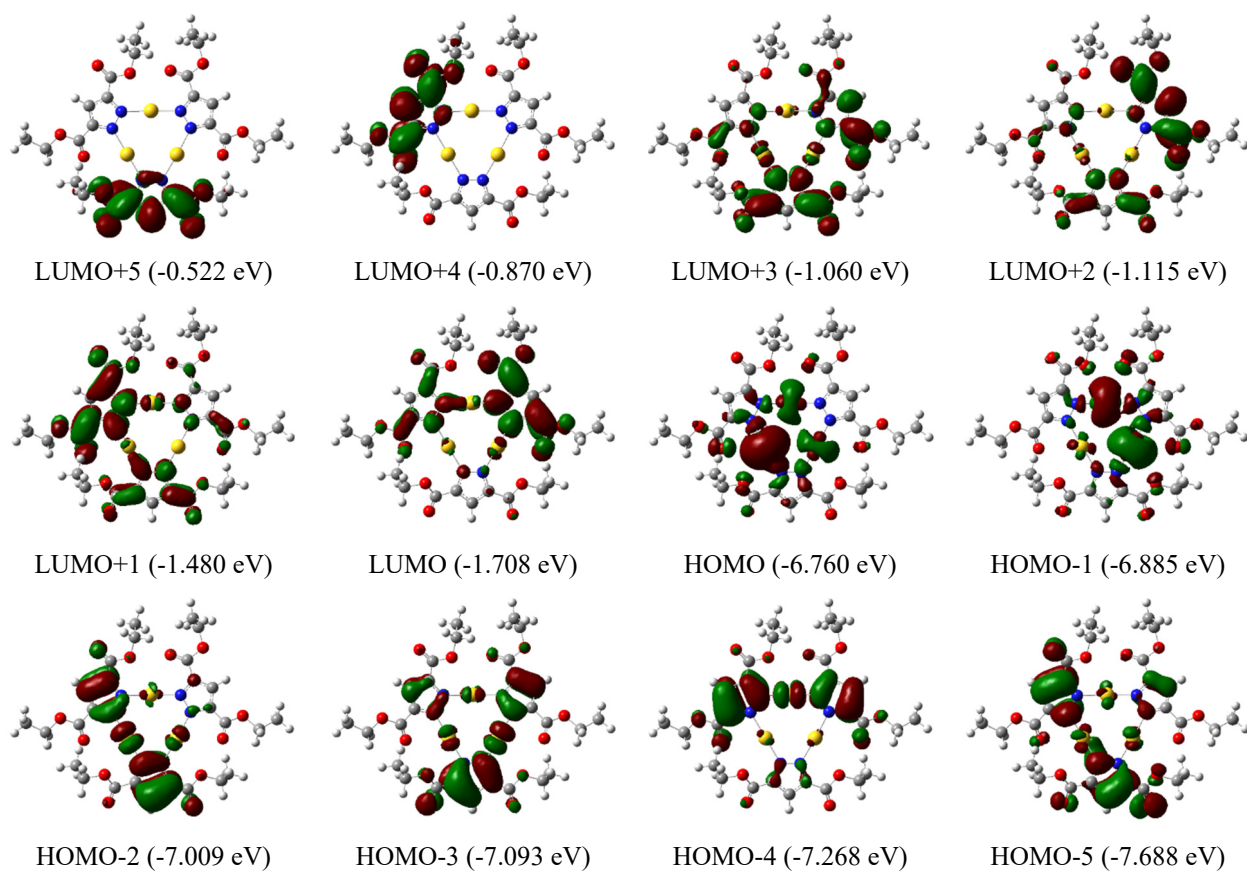

**Figure S34.** Selected molecular orbitals and energy level (eV) for monomer of  $\text{Au}_3$ .

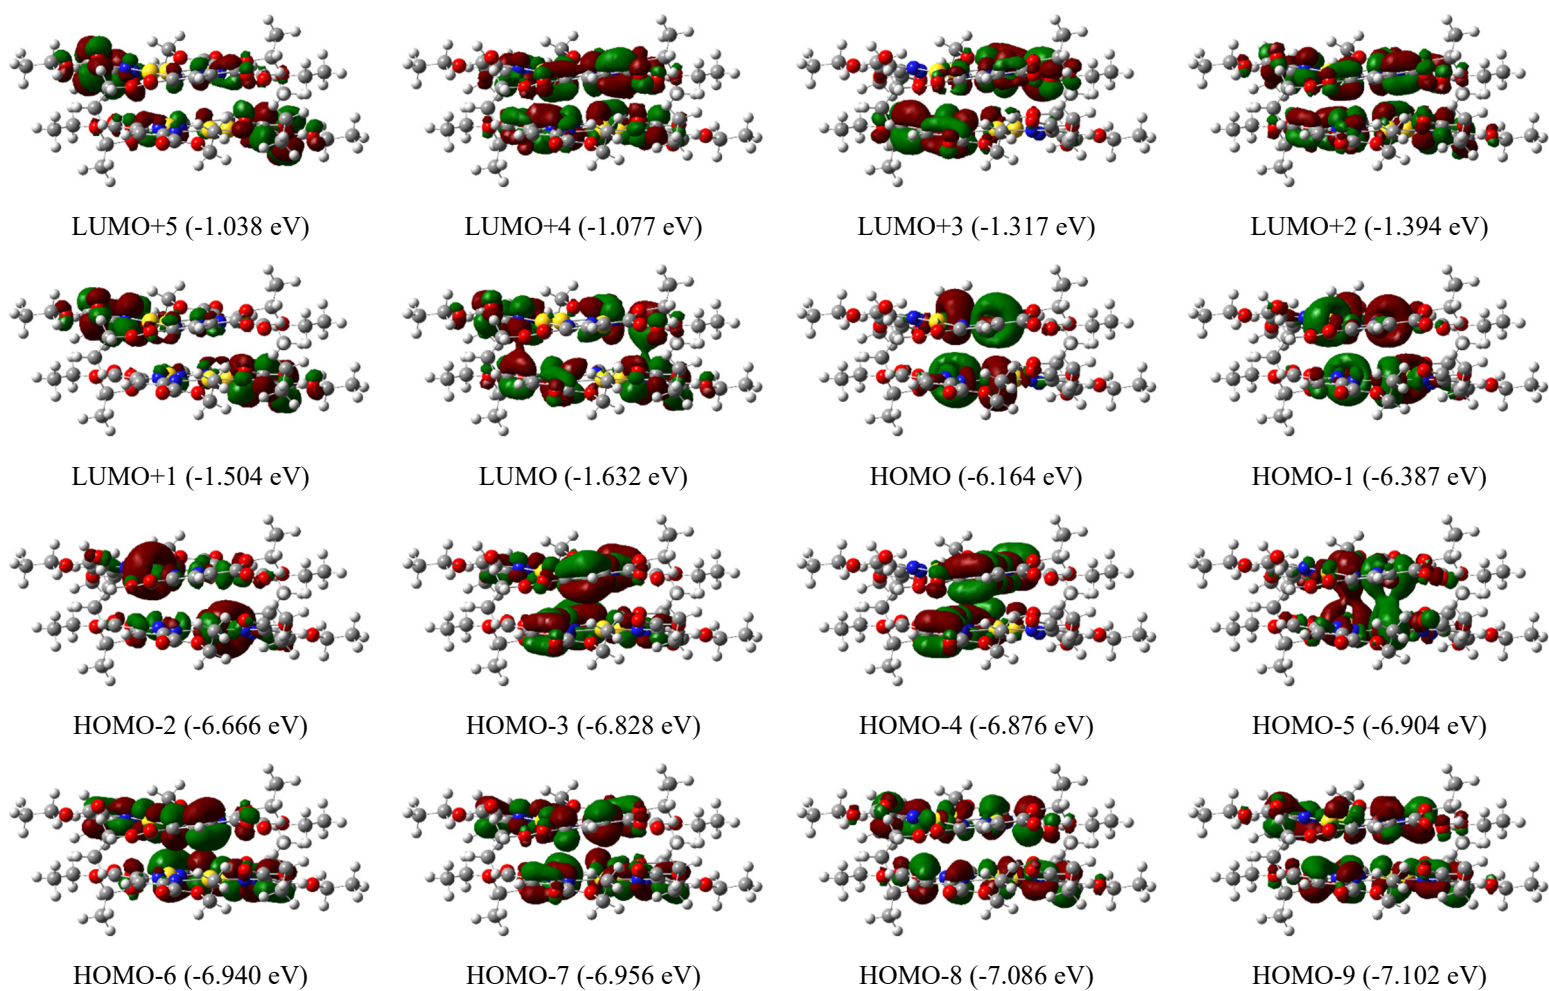

**Figure S35.** Selected molecular orbitals and energy level (eV) for dimer of  $\text{Au}_3$ .



**Table S10.** TD-DFT results of selected singlet excited states for monomer of **Au<sub>3</sub>**.

| No. | E /ev<br>( $\lambda$ /nm) | EDD                                                                                 | $f$   | Major transitions<br>and contributions                       | Type                                    |
|-----|---------------------------|-------------------------------------------------------------------------------------|-------|--------------------------------------------------------------|-----------------------------------------|
| 1   | 4.061<br>(305.5)          | 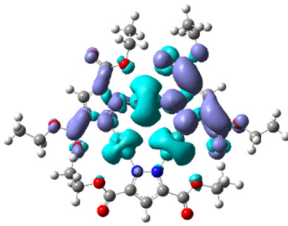   | 0.004 | H-1→L (75%),<br>H→L (13%),<br>H→L+1 (6%)                     | <sup>1</sup> MLCT                       |
| 5   | 4.574<br>(271.2)          |    | 0.013 | H-3→L (57%),<br>H-2→L+1 (19%),<br>H-4→L (12%)                | <sup>1</sup> MLCT/<br><sup>1</sup> ILCT |
| 7   | 4.651<br>(266.8)          |    | 0.142 | H-2→L (55%),<br>H-2→L+1 (10%),<br>H→L+3 (6%)                 | <sup>1</sup> MLCT/<br><sup>1</sup> ILCT |
| 8   | 4.753<br>(261.0)          |   | 0.303 | H-2→L+1 (50%),<br>H-4→L (28%),<br>H-2→L (7%)                 | <sup>1</sup> MLCT/<br><sup>1</sup> ILCT |
| 9   | 4.785<br>(259.3)          |  | 0.170 | H-4→L (47%),<br>H-3→L (23%),<br>H-2→L (15%),<br>H-2→L+1 (6%) | <sup>1</sup> MLCT/<br><sup>1</sup> ILCT |

**Table S11.** TD-DFT results of selected singlet excited states for dimer of **Au<sub>3</sub>**.

| No. | E /ev<br>( $\lambda$ /nm) | EDD                                                                                             |                                                                                                  | $f$   | Major transitions<br>and contributions | Type              |
|-----|---------------------------|-------------------------------------------------------------------------------------------------|--------------------------------------------------------------------------------------------------|-------|----------------------------------------|-------------------|
| 1   | 3.662<br>(338.8)          | Top View<br>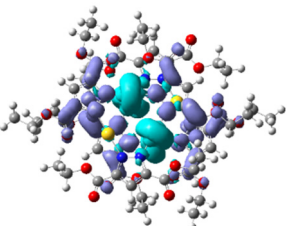 | Side View<br> | 0.034 | H→L (91%)                              | <sup>1</sup> MLCT |

|   |                  |                                                                                   |                                                                                    |       |                                                                |                   |
|---|------------------|-----------------------------------------------------------------------------------|------------------------------------------------------------------------------------|-------|----------------------------------------------------------------|-------------------|
| 2 | 3.777<br>(328.5) | 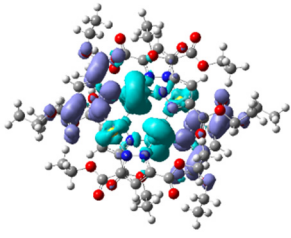 |  | 0.000 | H→L+1 (54%),<br>H-1→L (33%)                                    | <sup>1</sup> MLCT |
| 3 | 3.868<br>(320.7) |  |  | 0.002 | H→L+2 (59%),<br>H-1→L+1 (22%),<br>H-2→L (7%)                   | <sup>1</sup> MLCT |
| 6 | 4.011<br>(309.3) |  |  | 0.015 | H-1→L+1 (38%),<br>H→L+2 (29%),<br>H-2→L (14%),<br>H-2→L+2 (6%) | <sup>1</sup> MLCT |

**Table S12.** TD-DFT results of selected triplet excited states for monomer of **Au<sub>3</sub>**.

| No. | E /ev<br>(λ /nm) | EDD                                                                                 | Major transitions and contributions                                           | Type                                    |
|-----|------------------|-------------------------------------------------------------------------------------|-------------------------------------------------------------------------------|-----------------------------------------|
| 1   | 3.519<br>(352.6) | 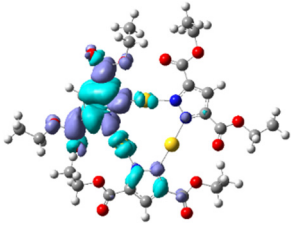 | H-2→L+1 (19%),<br>H-4→L+1 (18%),<br>H-4→L (8%),<br>H-5→L+1 (7%)               | <sup>3</sup> ILCT/<br><sup>3</sup> MLCT |
| 2   | 3.534<br>(351.1) |  | H-4→L (19%),<br>H-9→L (14%),<br>H-3→L (11%),<br>H-3→L+1 (8%),<br>H-3→L+3 (6%) | <sup>3</sup> ILCT/<br><sup>3</sup> MLCT |
| 3   | 3.558<br>(348.7) |  | H-3→L+3 (14%),<br>H-3→L+2 (8%),<br>H-3→L+1 (6%),<br>H-2→L+3 (6%)              | <sup>3</sup> ILCT/<br><sup>3</sup> MLCT |

**Table S13.** TD-DFT results of selected triplet excited states for dimer of  $\text{Au}_3$ .

| No. | E /ev<br>( $\lambda$ /nm) | EDD                                                                                               |                                                                                                     | Major transitions and contributions                                                                                                                | Type                                |
|-----|---------------------------|---------------------------------------------------------------------------------------------------|-----------------------------------------------------------------------------------------------------|----------------------------------------------------------------------------------------------------------------------------------------------------|-------------------------------------|
| 1   | 3.445<br>(360.2)          | <p>Top View</p> 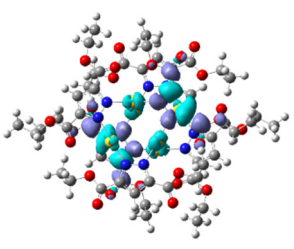 | <p>Side View</p>  | H $\rightarrow$ L (22%),<br>H-9 $\rightarrow$ L+3 (9%),<br>H-8 $\rightarrow$ L (9%)                                                                | $^3\text{ILCT}/$<br>$^3\text{MLCT}$ |
| 2   | 3.462<br>(358.4)          |                  |                   | H-8 $\rightarrow$ L+3 (13%),<br>H-9 $\rightarrow$ L (11%),<br>H-3 $\rightarrow$ L (6%)                                                             | $^3\text{ILCT}/$<br>$^3\text{MLCT}$ |
| 3   | 3.504<br>(354.1)          |                 |                 | H-6 $\rightarrow$ L+2 (9%),<br>H $\rightarrow$ L (9%),<br>H-7 $\rightarrow$ L+4 (8%),<br>H-4 $\rightarrow$ L+2 (7%),<br>H-7 $\rightarrow$ L+3 (5%) | $^3\text{ILCT}/$<br>$^3\text{MLCT}$ |

$\text{Au}_6\text{Ag}^*$

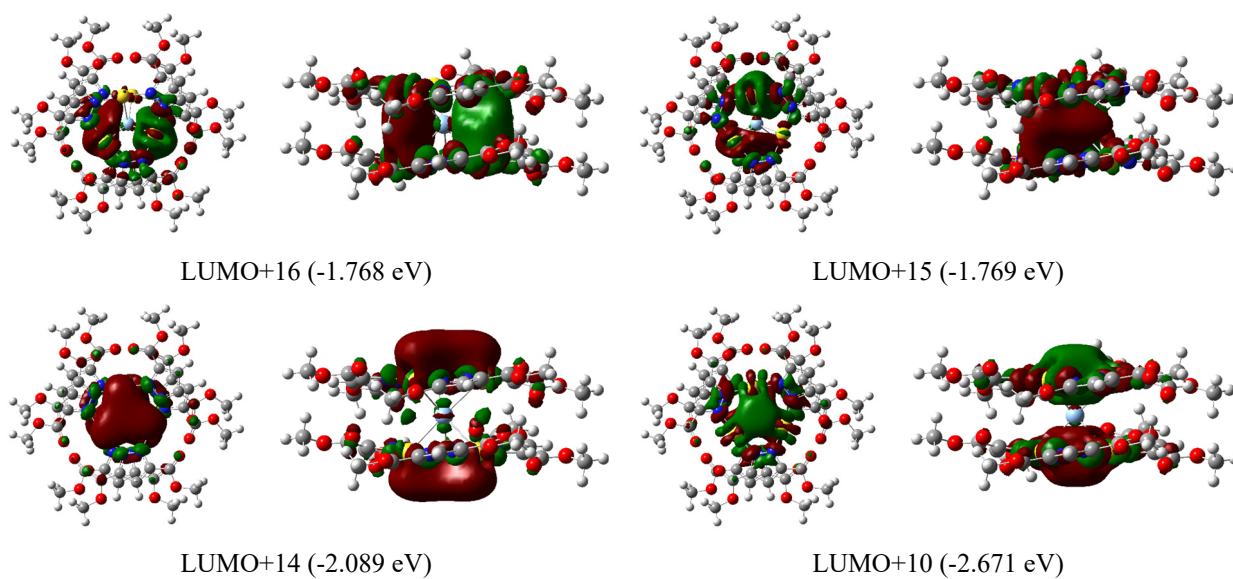

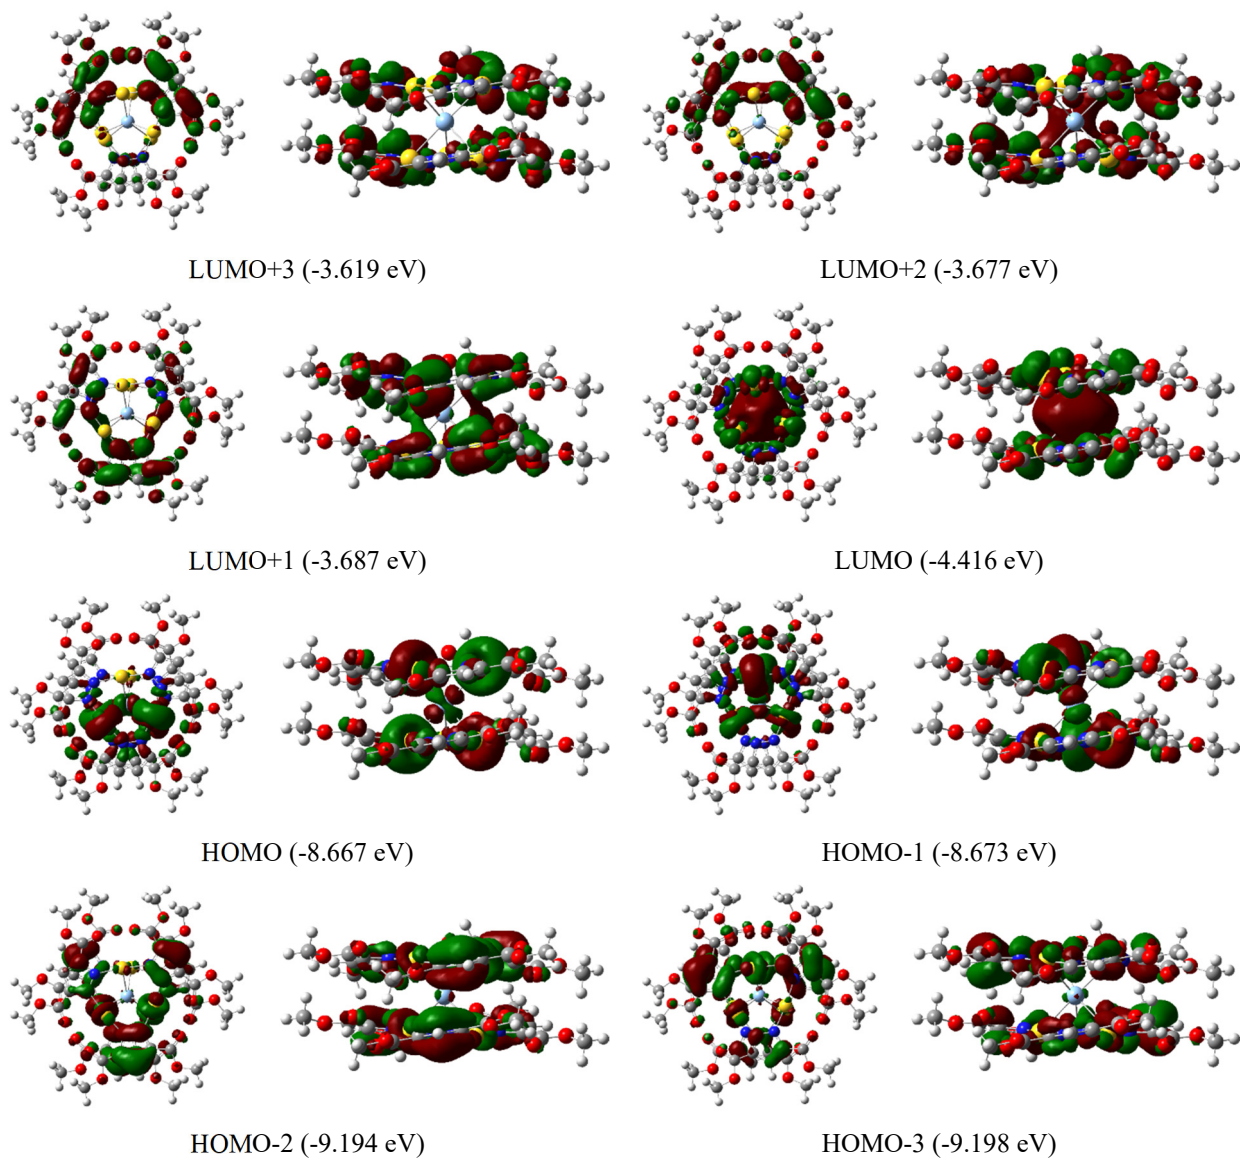

**Figure S36.** Selected molecular orbitals and energy level (eV) for  $\text{Au}_6\text{Ag}^*$ .

$\text{Au}_9\text{Ag}^*$

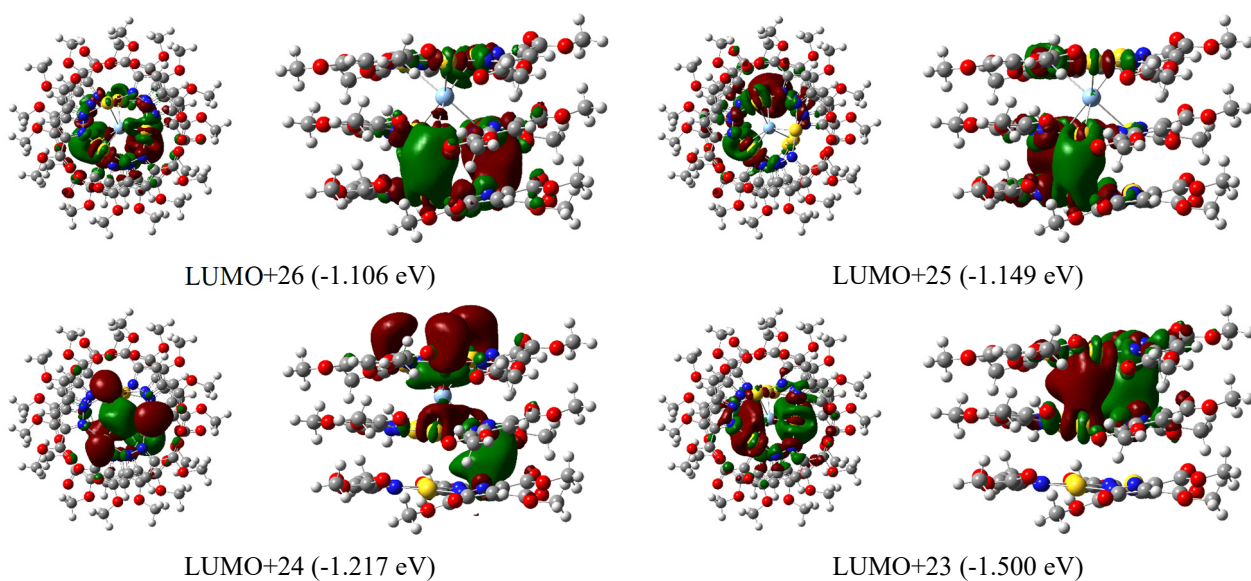

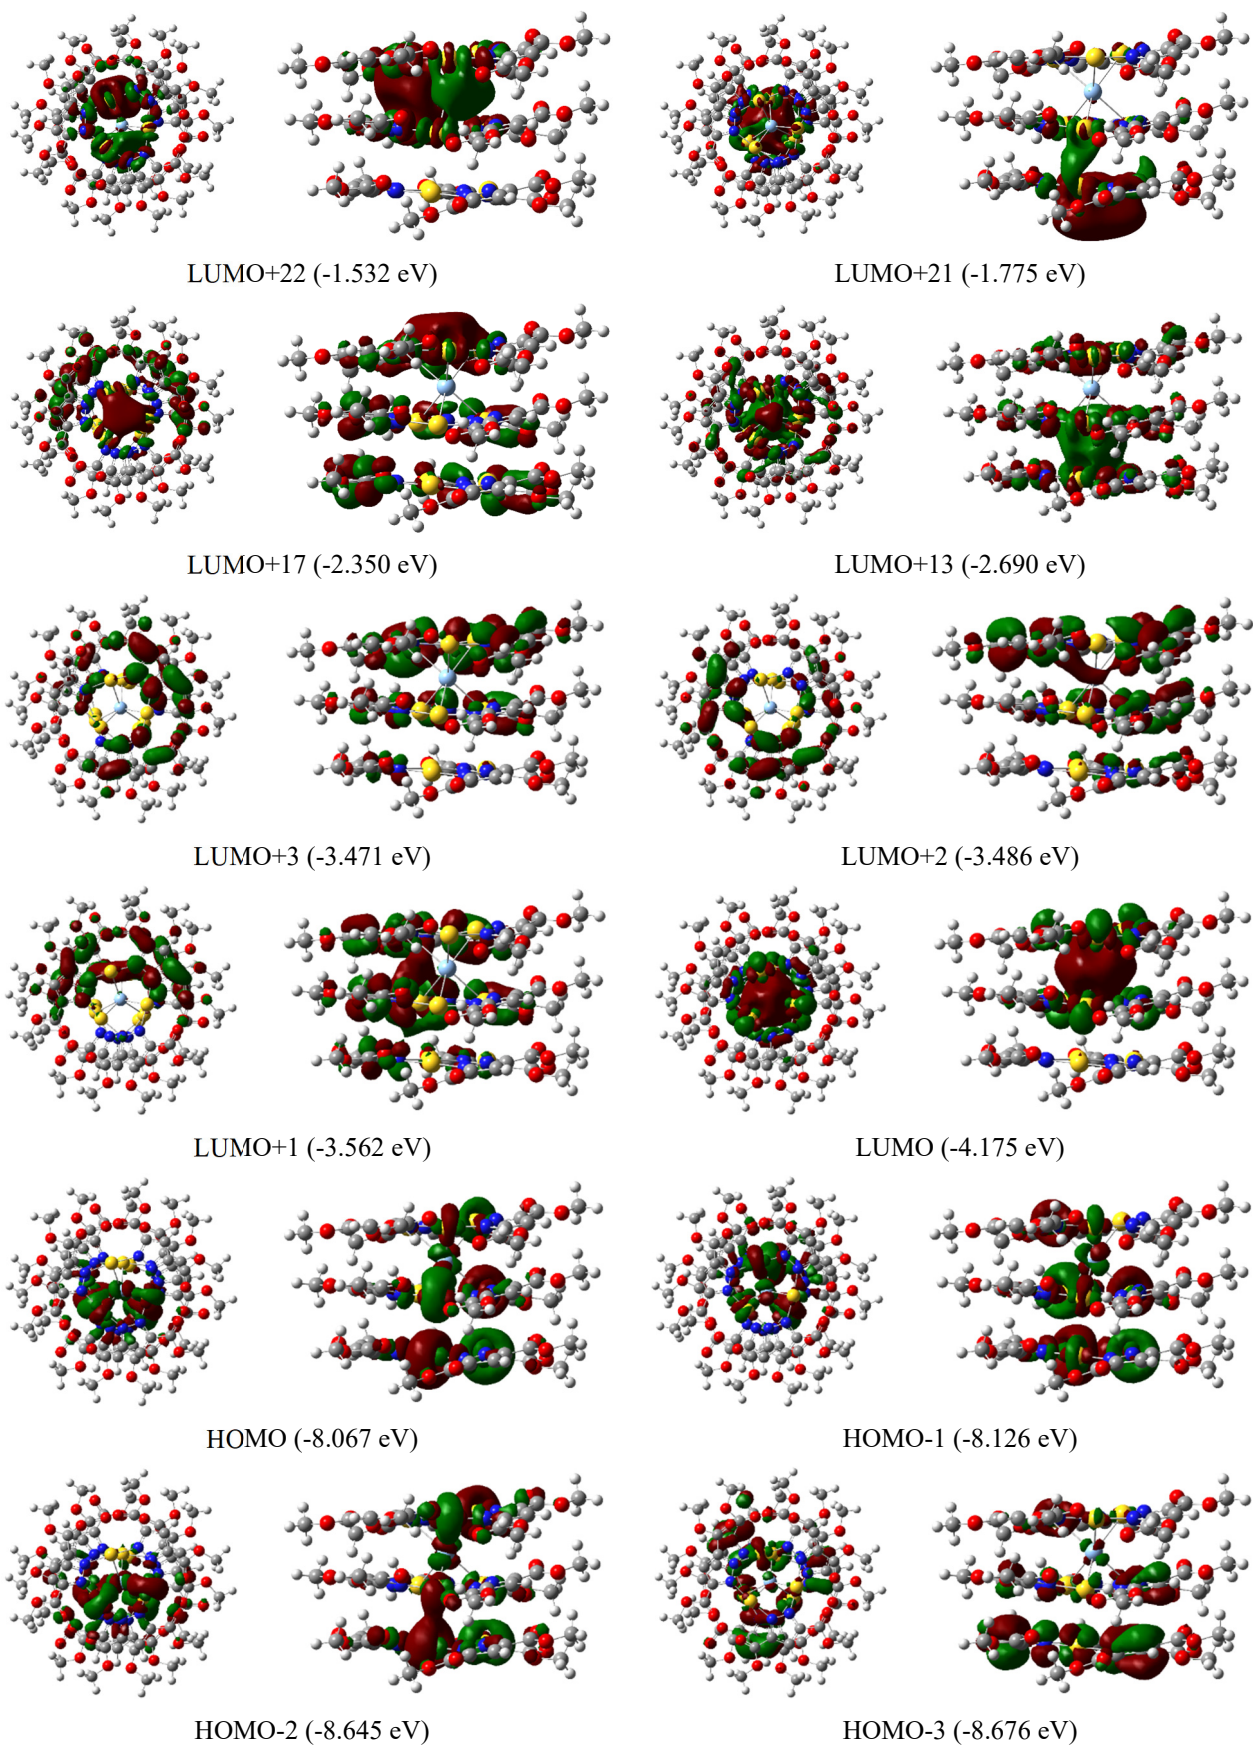

**Figure S37.** Selected molecular orbitals and energy level (eV) for Au<sub>9</sub>Ag\*.

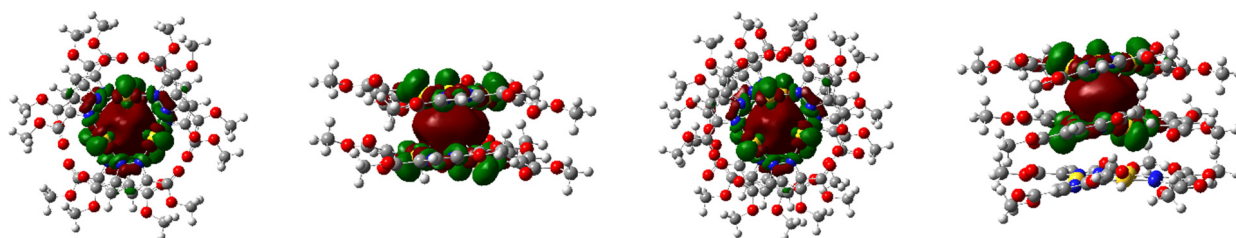

**Au<sub>6</sub>Ag\***

**Au<sub>9</sub>Ag\***

**Figure S38.** Highest singly occupied molecular orbitals (HSOMO) for **Au<sub>6</sub>Ag\*** and **Au<sub>9</sub>Ag\*** at T<sub>1</sub> state.

**Table S14.** TD-DFT results of selected singlet excited states for **Au<sub>6</sub>Ag\***.

| No. | E /ev<br>(λ /nm) | EDD      |           | <i>f</i> | Major transitions<br>and contributions | Type                                  |
|-----|------------------|----------|-----------|----------|----------------------------------------|---------------------------------------|
|     |                  | Top View | Side View |          |                                        |                                       |
| 1   | 3.345<br>(370.9) |          |           | 0.001    | H→L (97%)                              | <sup>1</sup> MC                       |
| 2   | 3.350<br>(370.3) |          |           | 0.001    | H-1→L (97%)                            | <sup>1</sup> MC                       |
| 6   | 3.955<br>(313.7) |          |           | 0.031    | H-6→L (70%),<br>H-5→L (20%)            | <sup>1</sup> LMCT/<br><sup>1</sup> MC |
| 7   | 3.956<br>(313.6) |          |           | 0.031    | H-6→L (20%),<br>H-5→L (69%)            | <sup>1</sup> LMCT/<br><sup>1</sup> MC |

**Table S15.** TD-DFT results of selected singlet excited states for **Au<sub>9</sub>Ag\***.

| No. | E /ev<br>(λ /nm) | EDD                                                                                 |                                                                                     | <i>f</i> | Major transitions<br>and contributions                                          | Type                                  |
|-----|------------------|-------------------------------------------------------------------------------------|-------------------------------------------------------------------------------------|----------|---------------------------------------------------------------------------------|---------------------------------------|
|     |                  | Top View                                                                            | Side View                                                                           |          |                                                                                 |                                       |
| 1   | 3.080<br>(402.9) | 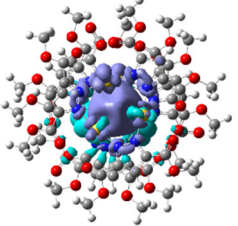   |    | 0.000    | H→L (96%)                                                                       | <sup>1</sup> LMCT/<br><sup>1</sup> MC |
| 2   | 3.131<br>(396.3) |    |    | 0.001    | H-1→L (95%)                                                                     | <sup>1</sup> LMCT/<br><sup>1</sup> MC |
| 5   | 3.707<br>(334.7) |   |   | 0.060    | H-1→L+1 (32%),<br>H→L+1 (31%),<br>H→L+4 (9%),<br>H-1→L+3 (6%),<br>H→L+3 (4%)    | <sup>1</sup> MLCT                     |
| 6   | 3.730<br>(332.7) |  |  | 0.028    | H→L+1 (32%),<br>H-1→L+1 (27%),<br>H-1→L+2 (12%),<br>H→L+3 (7%),<br>H-1→L+3 (6%) | <sup>1</sup> MLCT                     |

**Table S16.** TD-DFT results of selected triplet excited states for **Au<sub>6</sub>Ag\***.

| No. | E /ev<br>(λ /nm) | EDD                                                                                 |                                                                                      | Major transitions<br>and contributions | Type            |
|-----|------------------|-------------------------------------------------------------------------------------|--------------------------------------------------------------------------------------|----------------------------------------|-----------------|
|     |                  | Top View                                                                            | Side View                                                                            |                                        |                 |
| 1   | 2.877<br>(431.3) | 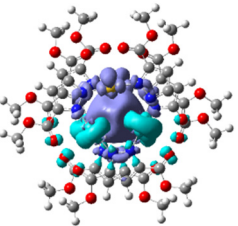 |  | H→L (95%)                              | <sup>3</sup> MC |
| 2   | 2.884<br>(430.2) |  |  | H-1→L (95%)                            | <sup>3</sup> MC |

**Table S17.** TD-DFT results of selected triplet excited states for **Au<sub>9</sub>Ag\***.

| No. | E /ev<br>(λ /nm) | EDD                                                                                               |                                                                                                     | Major transitions and contributions | Type            |
|-----|------------------|---------------------------------------------------------------------------------------------------|-----------------------------------------------------------------------------------------------------|-------------------------------------|-----------------|
| 1   | 2.718<br>(456.4) | <p>Top View</p> 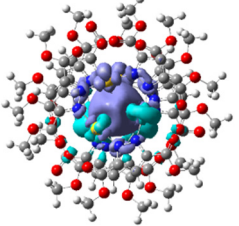 | <p>Side View</p>  | H→L (81%)                           | <sup>3</sup> MC |
| 2   | 2.767<br>(448.4) |                  |                   | H-1→L (82%)                         | <sup>3</sup> MC |

## References

- (1) *ADF 2018*. SCM, Theoretical Chemistry, Vrije Universiteit, Amsterdam, The Netherlands, <https://www.scm.com>, **2018**.
- (2) Grimme, S.; Antony, J.; Ehrlich, S.; Krieg, H. A Consistent and Accurate Ab Initio Parametrization of Density Functional Dispersion Correction (DFT-D) for the 94 Elements H-Pu. *J. Chem. Phys.* **2010**, *132*, 154104.
- (3) Perdew, J. P.; Burke, K.; Ernzerhof, M. Generalized Gradient Approximation Made Simple. *Phys. Rev. Lett.* **1996**, *77*, 3865–3868.
- (4) Perdew, J. P.; Burke, K.; Ernzerhof, M. Generalized Gradient Approximation Made Simple [Phys. Rev. Lett. 77, 3865 (1996)]. *Phys. Rev. Lett.* **1997**, *78*, 1396–1396.
- (5) Grimme, S.; Ehrlich, S.; Goerigk, L. Effect of the Damping Function in Dispersion Corrected Density Functional Theory. *J. Comput. Chem.* **2011**, *32*, 1456–1465.
- (6) van Lenthe, E.; Baerends, E. J. Optimized Slater-Type Basis Sets for the Elements 1–118. *J. Comput. Chem.* **2003**, *24*, 1142–1156.
- (7) Ziegler, T.; Rauk, A. A Theoretical Study of the Ethylene-Metal Bond in Complexes Between Cu<sup>+</sup>, Ag<sup>+</sup>, Au<sup>+</sup>, Pt<sup>0</sup>, or Pt<sup>2+</sup> and Ethylene, Based on the Hartree-Fock-Slater Transition-State Method. *Inorg. Chem.* **1979**, *18*, 1558–1565.
- (8) Ziegler, T.; Rauk, A. CO, CS, N<sub>2</sub>, PF<sub>3</sub>, and CNCH<sub>3</sub> as σ Donors and π Acceptors. a Theoretical Study by the Hartree-Fock-Slater Transition-State Method. *Inorg. Chem.* **1979**, *18*, 1755–1759.
- (9) Mitoraj, M. P.; Michalak, A.; Ziegler, T. A Combined Charge and Energy Decomposition Scheme for Bond Analysis. *J. Chem. Theory Comput.* **2009**, *5*, 962–975.
- (10) van Lenthe, E.; Baerends, E. J.; Snijders, J. G. Relativistic Total Energy Using Regular Approximations. *J. Chem. Phys.* **1994**, *101*, 9783–9792.
- (11) *Gaussian 16. A. 01*. Frisch, M. J.; Trucks, G. W.; Schlegel, H. B.; Scuseria, G. E.; Robb, M. A.; Cheeseman, J. R.; Scalmani, G.; Barone, V.; Petersson, G. A.; Nakatsuji, H.; Li, X.; Caricato, M.; Marenich, A. V.; Bloino, J.; Janesko, B. G.; Gomperts, R.; Mennucci, B.; Hratchian, H. P.; Ortiz, J. V.; Izmaylov, A. F.; Sonnenberg, J. L.; Williams-Young, D.; Ding, F.; Lipparini, F.; Egidi, F.; Goings, J.; Peng, B.; Petrone, A.; Henderson, T.; Ranasinghe, D.; Zakrzewski, V. G.; Gao, J.; Rega, N.; Zheng, G.; Liang, W.; Hada, M.; Ehara, M.; Toyato, K.; Fukuda, R.; Hasegawa, J.; Ishida, M.; Nakajima, T.; Honda, Y.; Kitao, O.; Nakai, H.; Vreven, T.; Throssell, K.; Montgomery, J. A. . J.; Peralta, J. E.; Ogliaro, F.; Bearpark, M. J.; Heyd, J. J.; Brothers, E. N.; Kudin, K. N.; Staroverov, V. N.; Keith, T. A.; Kobayashi, R.; Normand, J.; Raghavachari, K.; Rendell, A. P.; Burant, J. C.; Iyengar, S. S.; Tomasi, J.; Cossi, M.; Millam, J. M.; Klene, M.; Adamo, C.; Cammi, R.; Ochterski, J. W.; Martin, R. L.; Morokuma, K.; Farkas, O.; Foresman, J. B.; Fox, D. J. Gaussian, Inc.: Wallingford CT **2016**.
- (12) Ernzerhof, M.; Scuseria, G. E. Assessment of the Perdew–Burke–Ernzerhof Exchange–Correlation Functional. *J. Chem. Phys.* **1999**, *110*, 5029–5036.
- (13) Adamo, C.; Barone, V. Toward Reliable Density Functional Methods Without Adjustable Parameters: the PBE0 Model. *J. Chem. Phys.* **1999**, *110*, 6158–6170.
- (14) Hay, P. J.; Wadt, W. R. Ab Initio Effective Core Potentials for Molecular Calculations. Potentials for the Transition Metal Atoms Sc to Hg. *J. Chem. Phys.* **1985**, *82*, 270–283.
- (15) Hay, P. J.; Wadt, W. R. Ab Initio Effective Core Potentials for Molecular Calculations. Potentials for K to Au Including the Outermost Core Orbitals. *J. Chem. Phys.* **1985**, *82*, 299–310.
- (16) Petersson, G. A.; Bennett, A.; Tensfeldt, T. G.; Laham, A. I.; Shirley, W. A.; Mantzaris, J. A Complete Basis Set Model Chemistry. I. the Total Energies of Closed-Shell Atoms and Hydrides of the First-Row Elements. *J. Chem. Phys.* **1988**, *89*, 2193–2218.
- (17) Lu, T.; Chen, F. Multiwfn: a Multifunctional Wavefunction Analyzer. *J. Comput. Chem.* **2011**, *33*, 580–592.
